# Supplementary material for: Atomistic origins of charge traps in CdSe nanoclusters
Source: Royal Society of Chemistry journal article supplement (doi:10.1039/d0cp05139j), 2020-01-01
Supplement: d0cp05139j1.pdf [file d0cp05139j1.pdf]

# Atomistic Origins of Charge Traps in CdSe nanoclusters

V. S. Baturin<sup>1,2(a)</sup>, S. V. Lepeshkin<sup>1,2</sup>, N. A. Bushlanova<sup>2</sup>,  
and Yu. A. Uspenskii<sup>2</sup>

## SUPPORTING INFORMATION

<sup>1</sup>Skolkovo Institute of Science and Technology, Bolshoy Boulevard 30, bld. 1, Moscow, 121205, Russian Federation

<sup>2</sup>Lebedev Physical Institute, Russian Academy of Sciences, Leninskii prosp. 53, Moscow, 119991, Russian Federation

<sup>(a)</sup> correspondence to [v.baturin@skoltech.ru](mailto:v.baturin@skoltech.ru)

### Contents

|                                                                                                                                                                                                                 |    |
|-----------------------------------------------------------------------------------------------------------------------------------------------------------------------------------------------------------------|----|
| <b>Table S1</b> Globally optimized structures of Cd <sub>n</sub> Se <sub>m</sub> structures ( $1 \leq n, m \leq 15$ ).....                                                                                      | 2  |
| <b>Figure S1</b> Relative stability of Cd <sub>n</sub> Se <sub>m</sub> clusters .....                                                                                                                           | 17 |
| <b>Figure S2</b> The structure, DOS and $IPR = 1/N_{loc}(i)$ of the Cd <sub>10</sub> Se <sub>15</sub> (a) and Cd <sub>11</sub> Se <sub>12</sub> (b) clusters, corresponding to three stabilization stages ..... | 18 |
| <b>Table S2</b> Wavefunction, type and localization of strong and medium near-gap traps .....                                                                                                                   | 19 |

**Table S1** Globally optimized structures of  $\text{Cd}_n\text{Se}_m$  structures ( $1 \leq n, m \leq 15$ ).

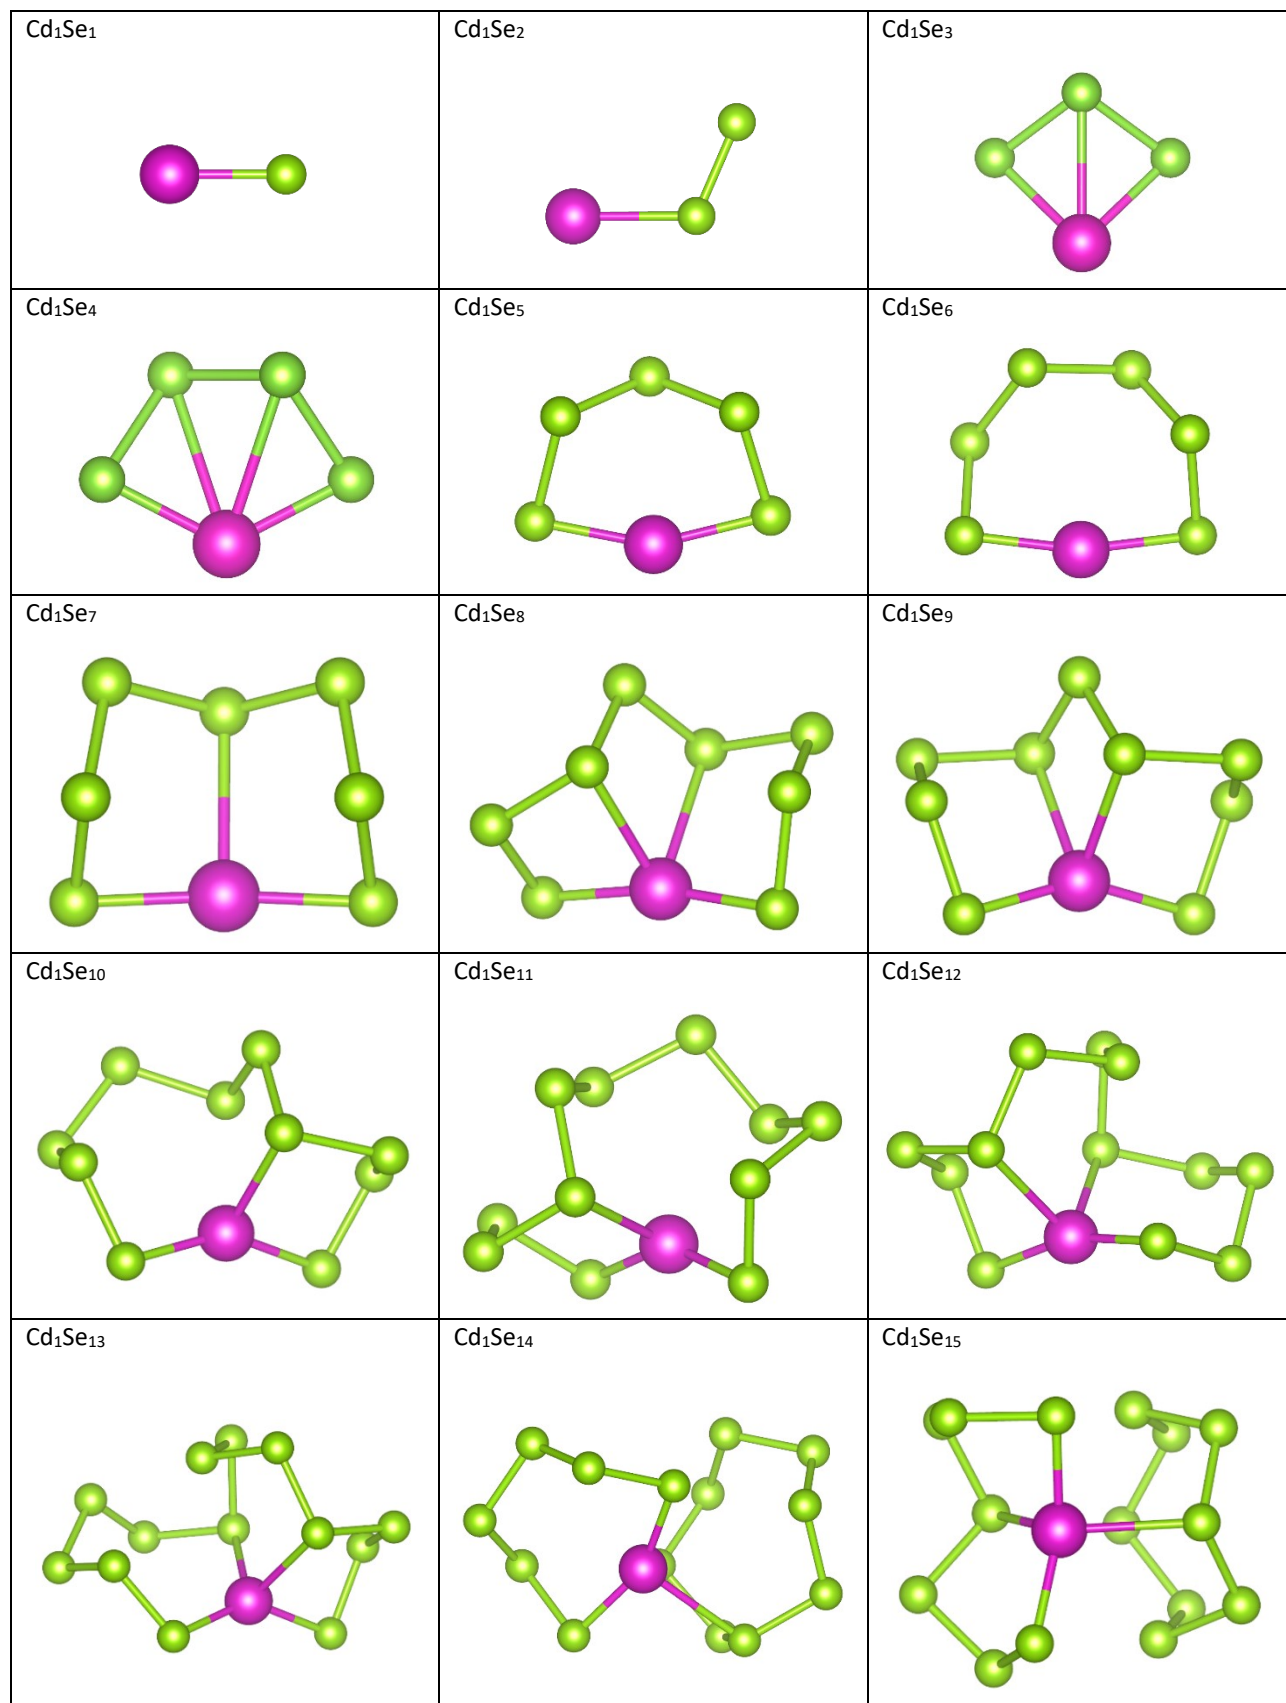

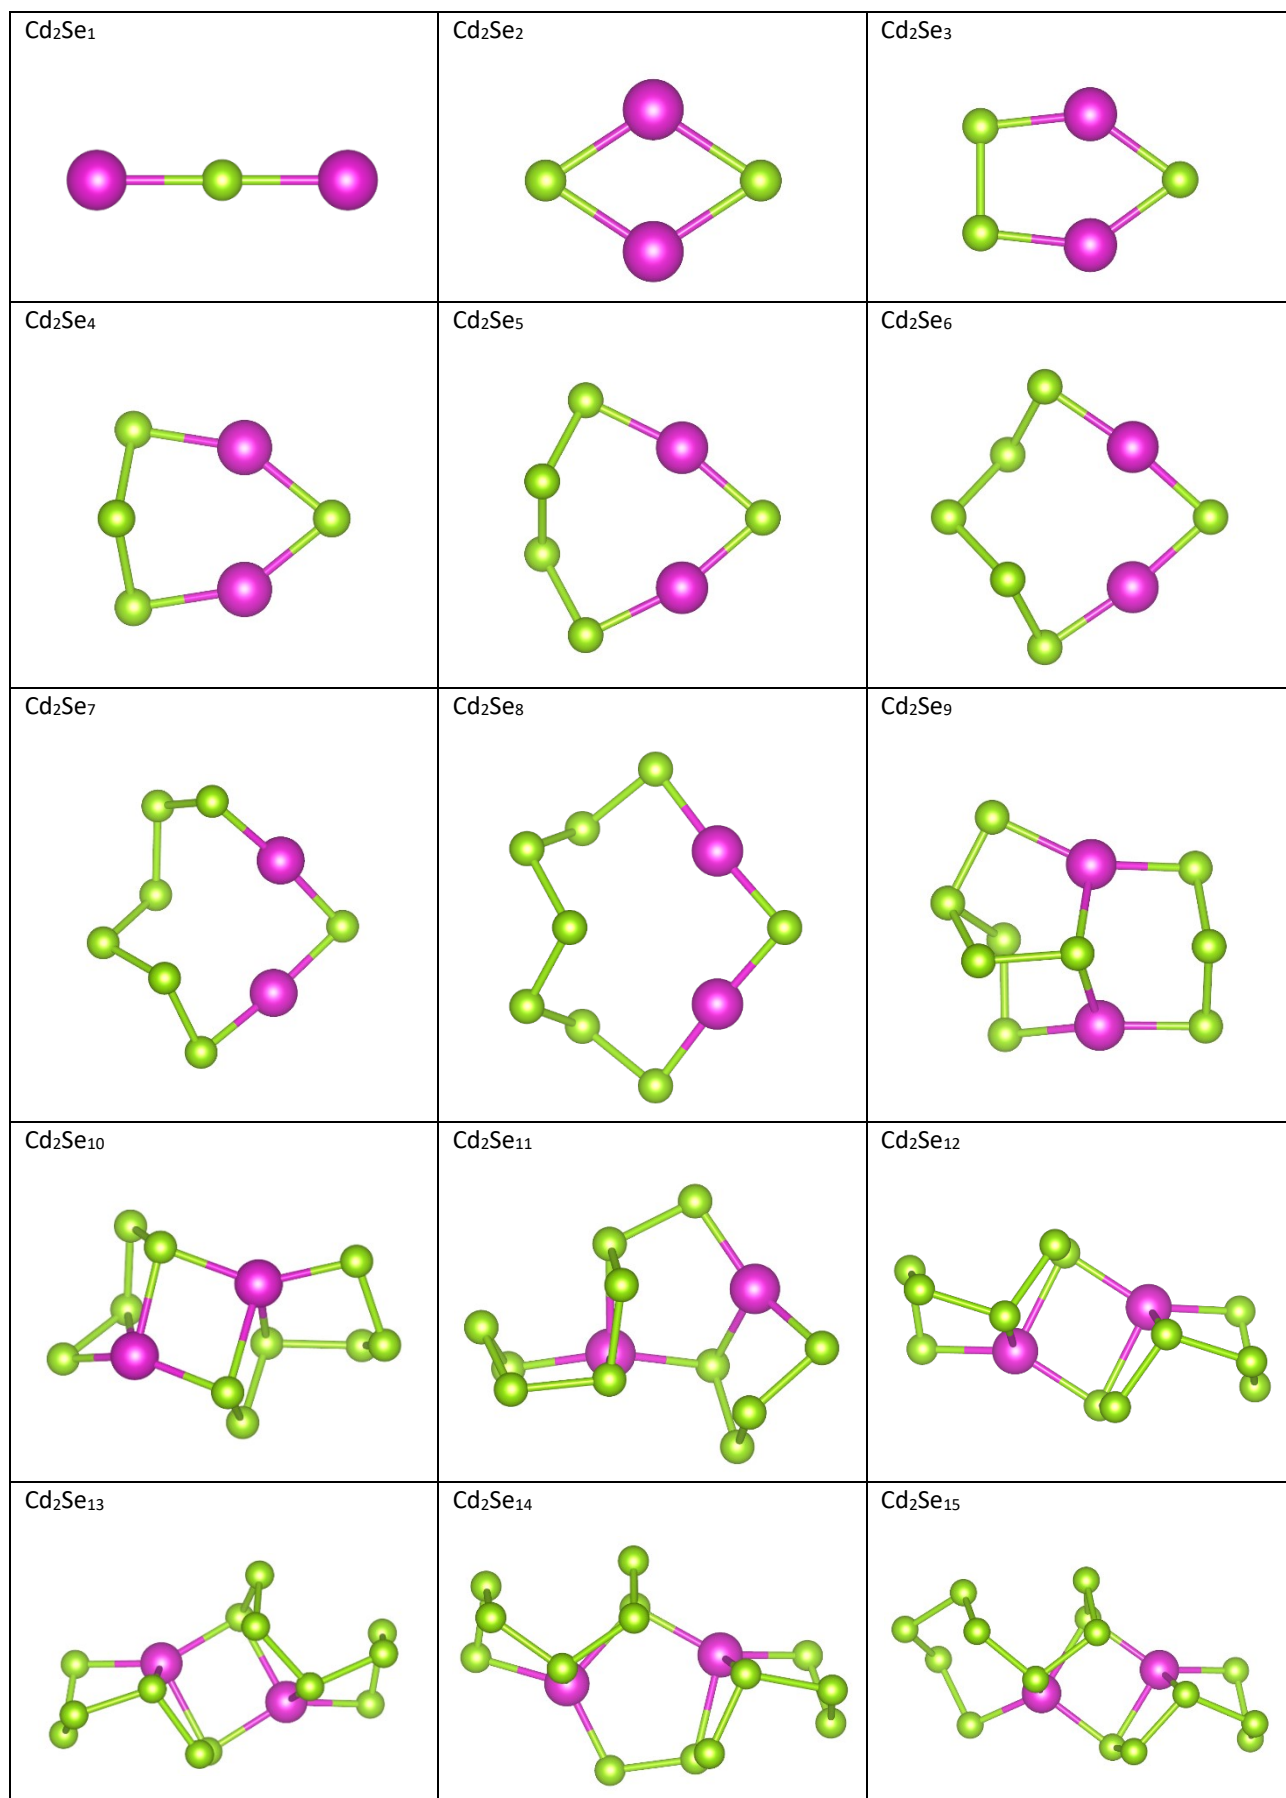

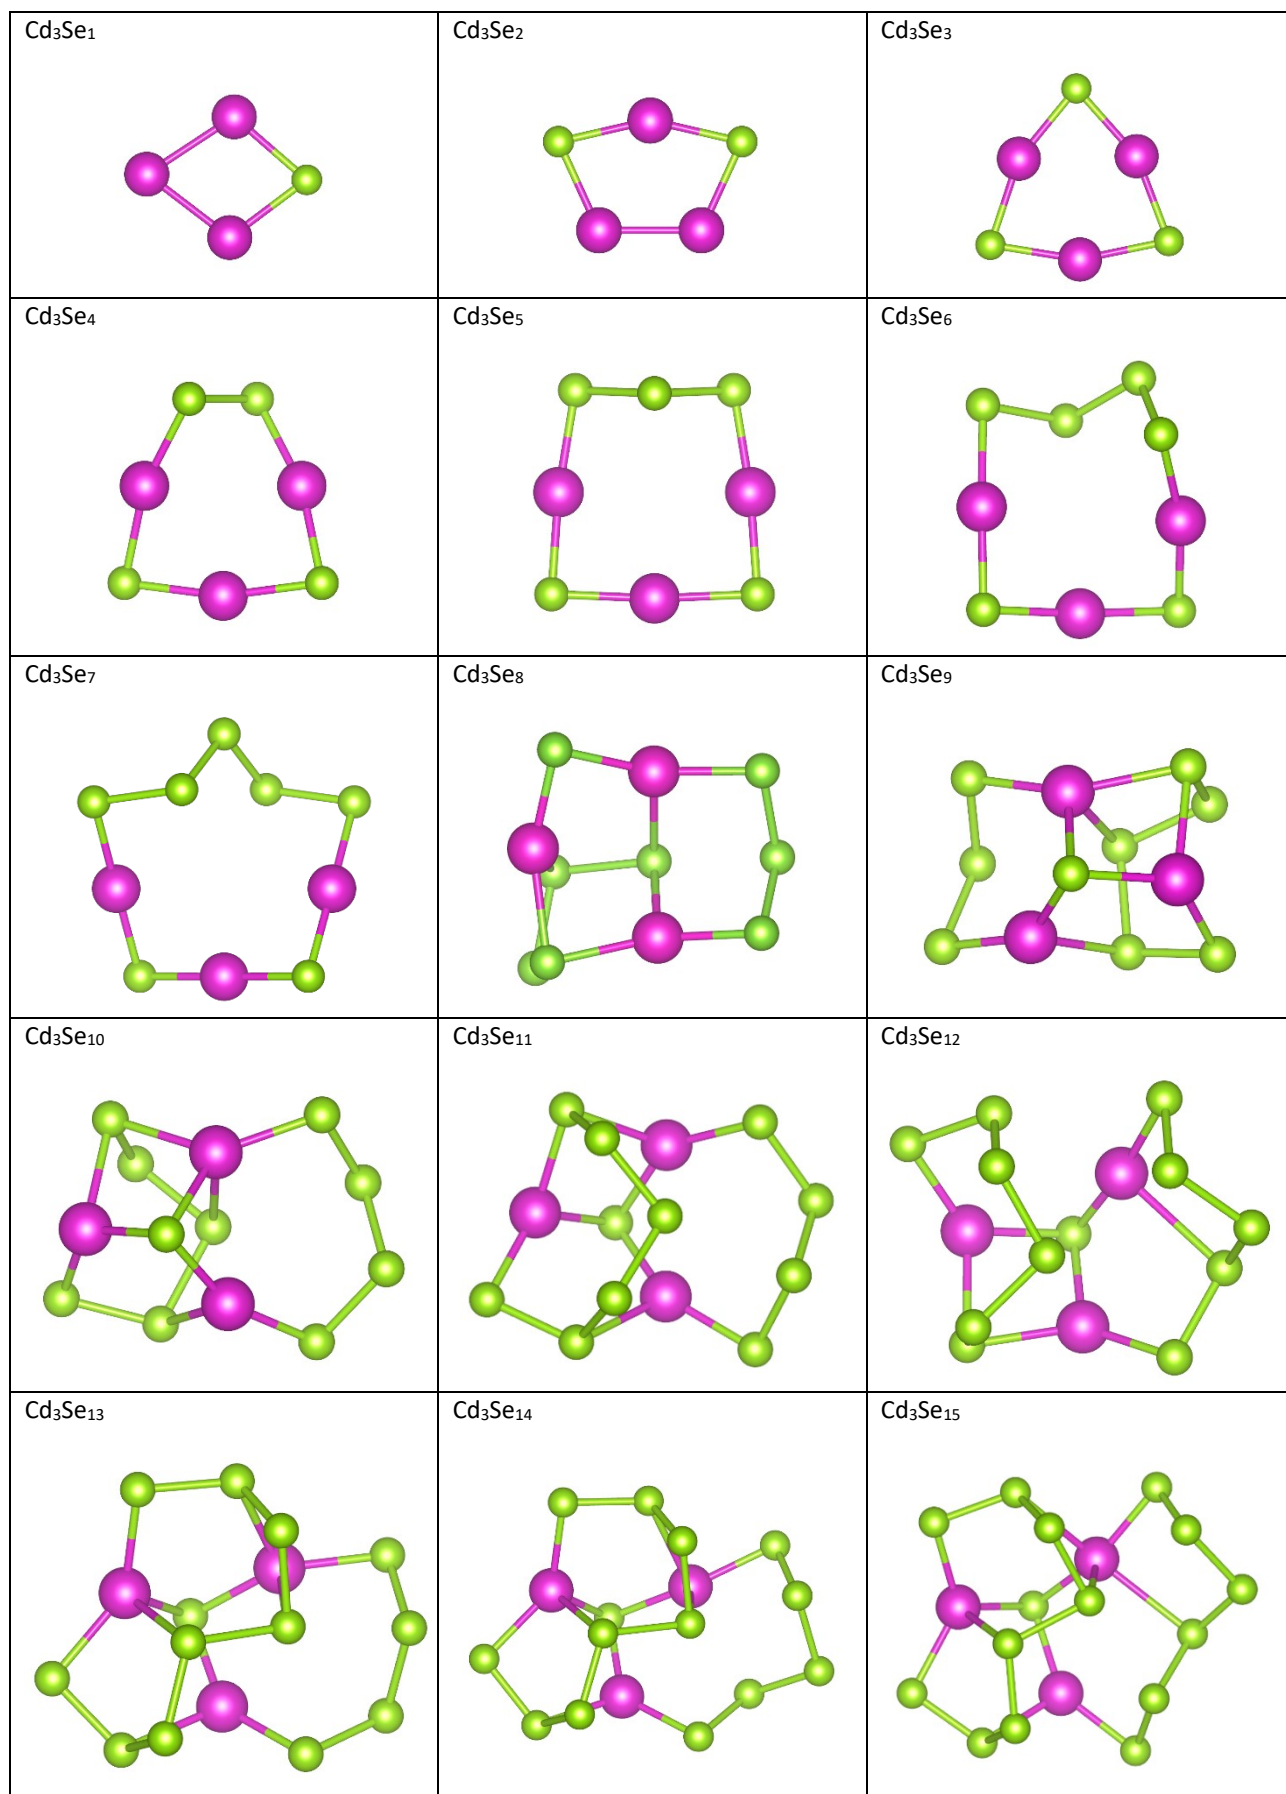

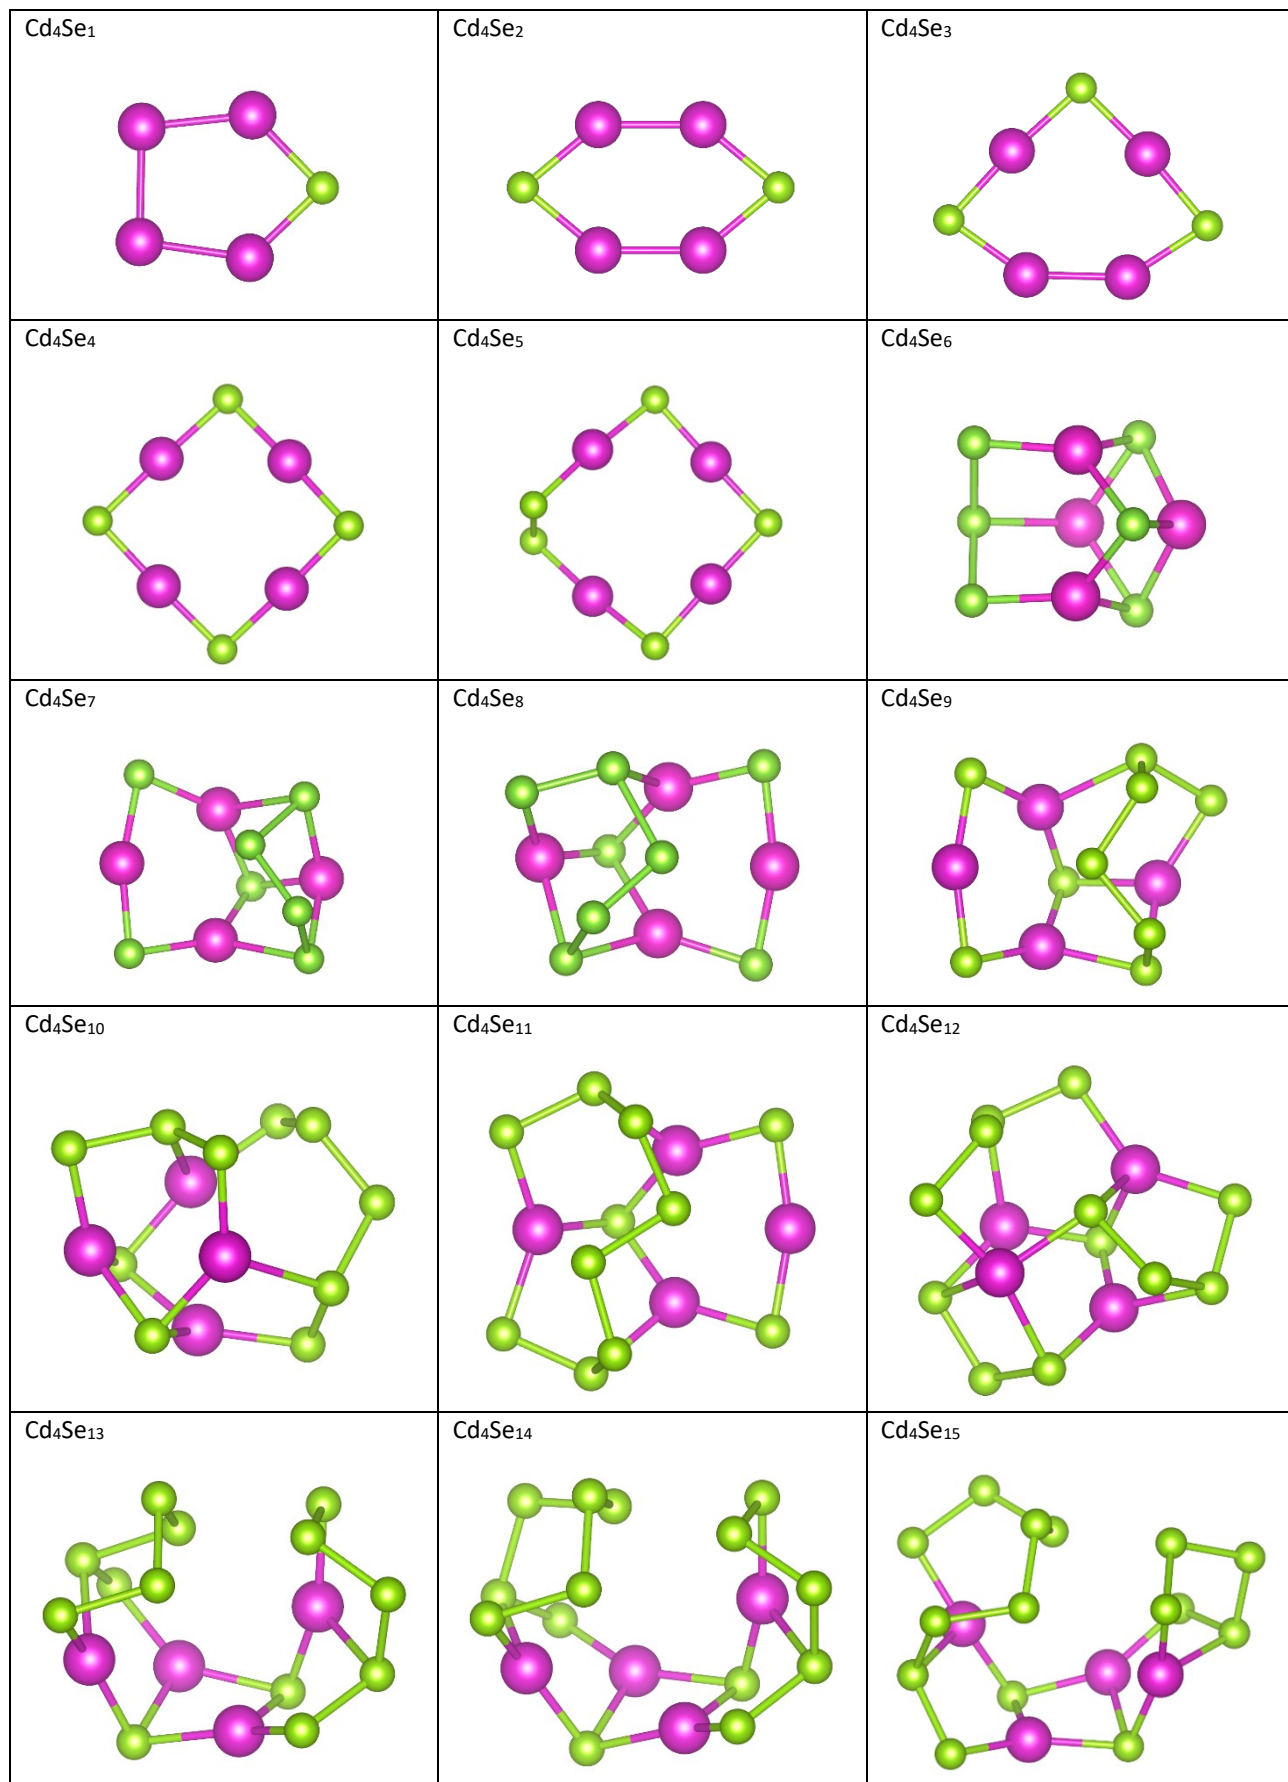

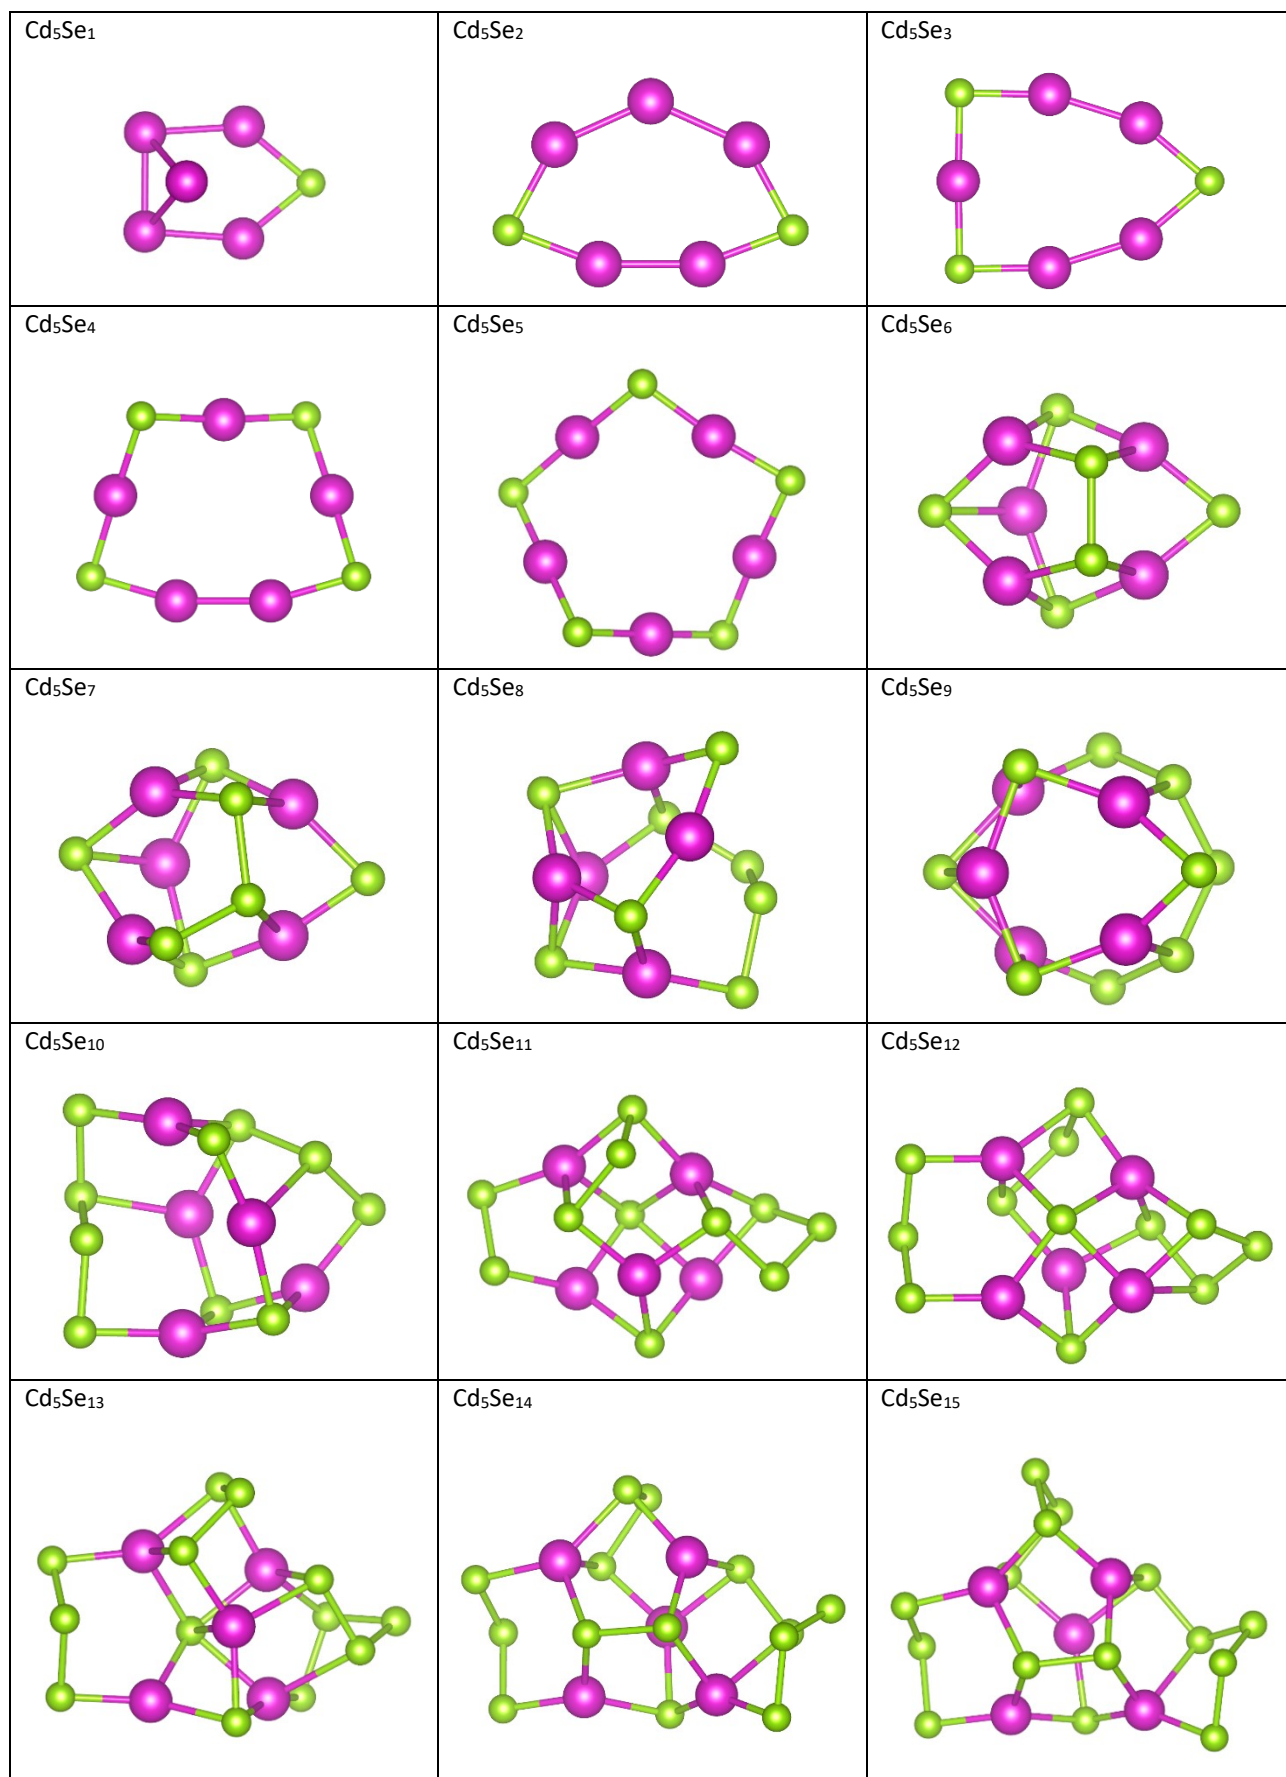

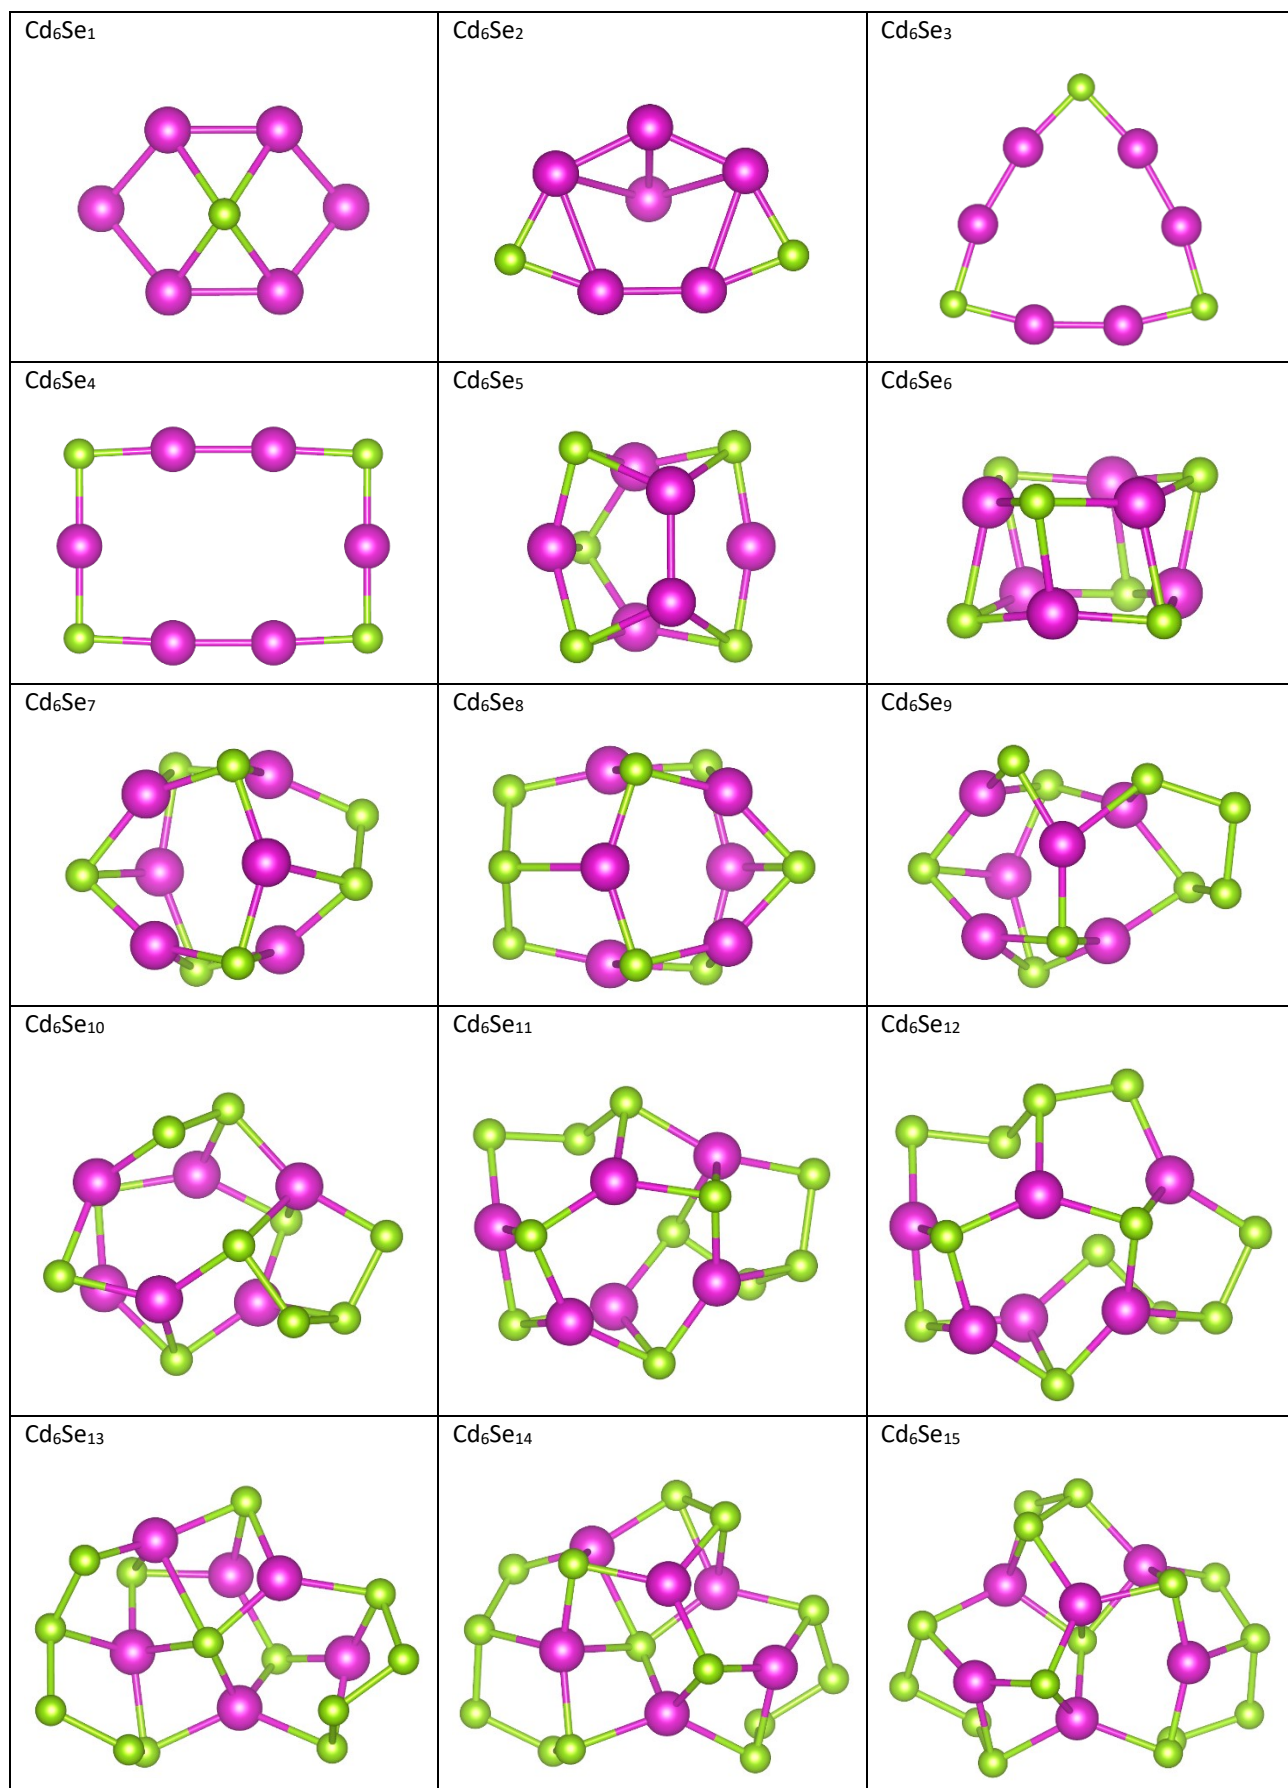

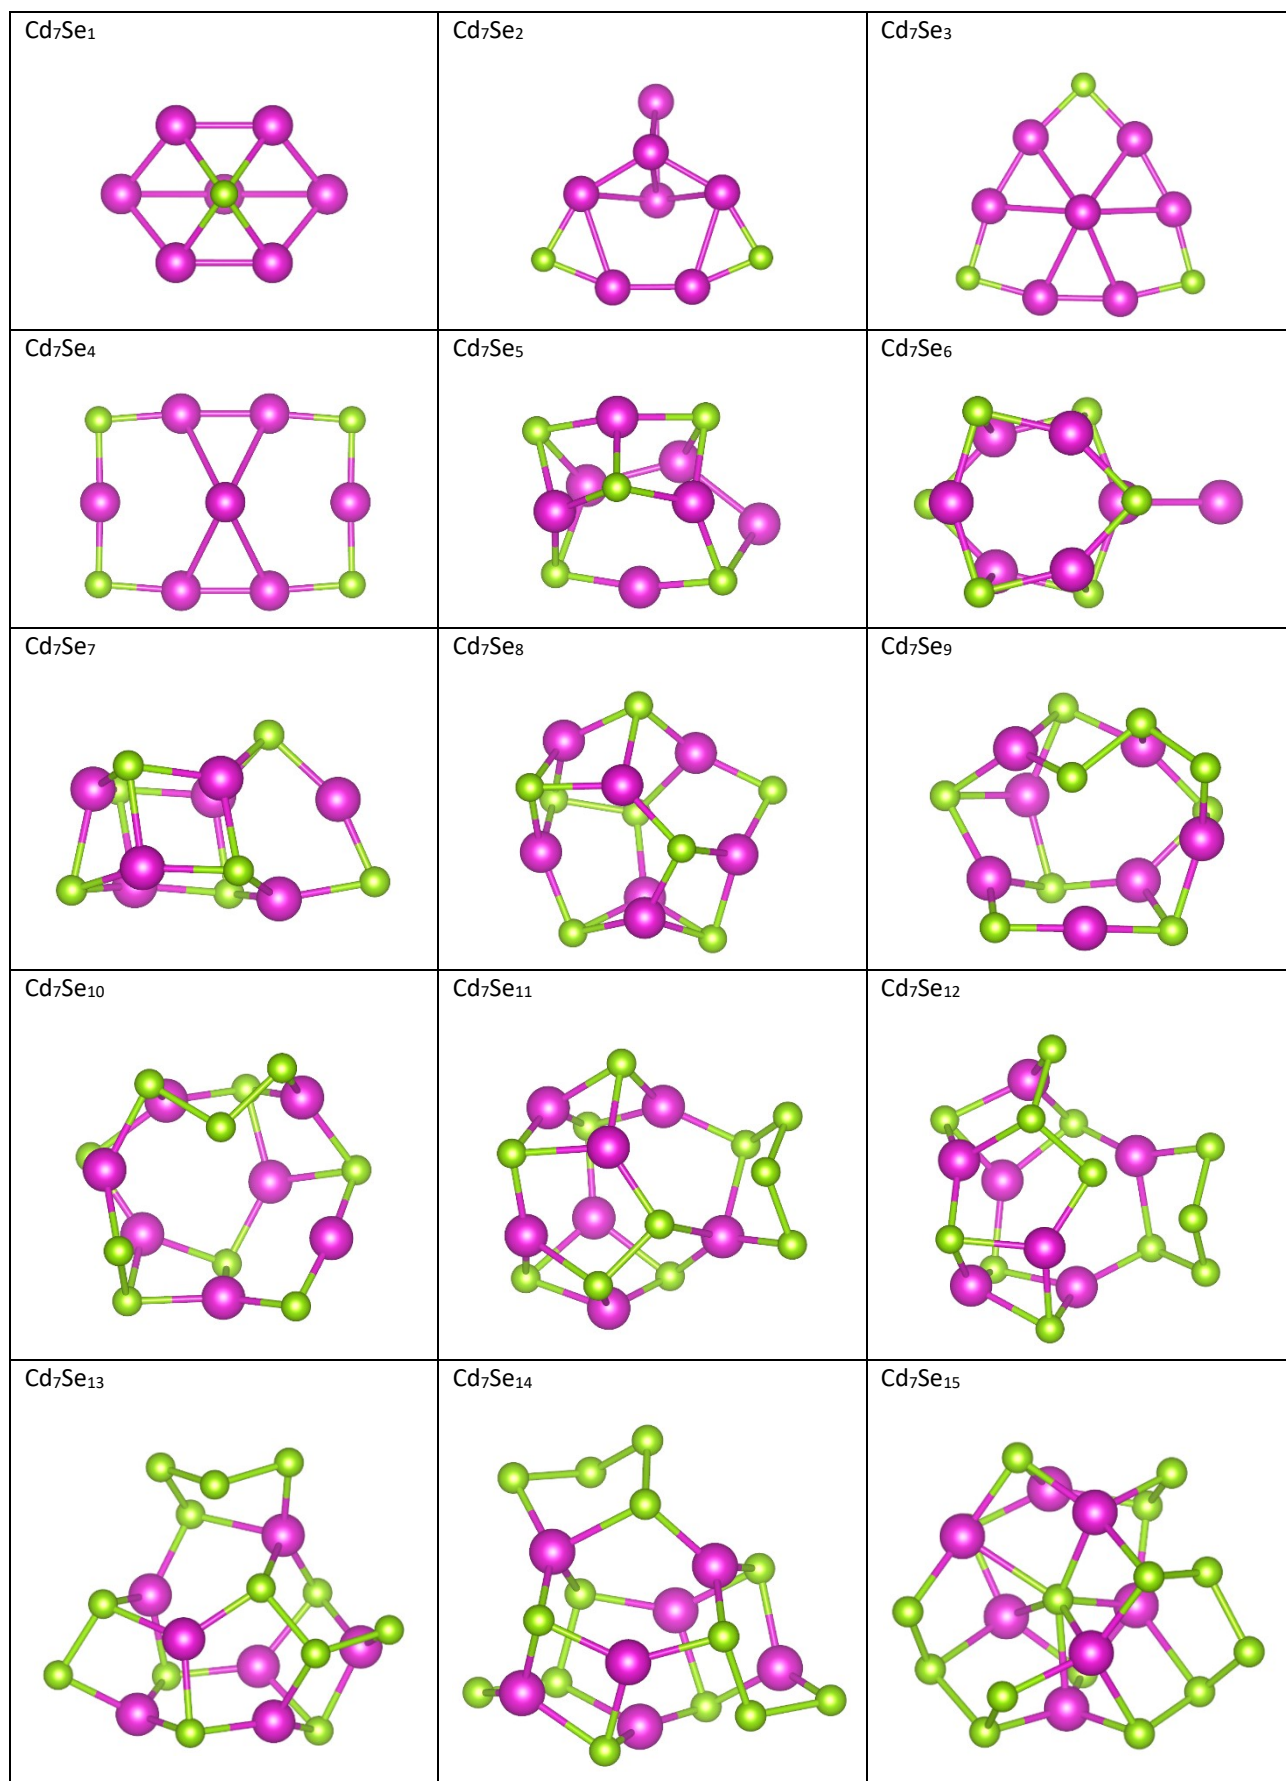



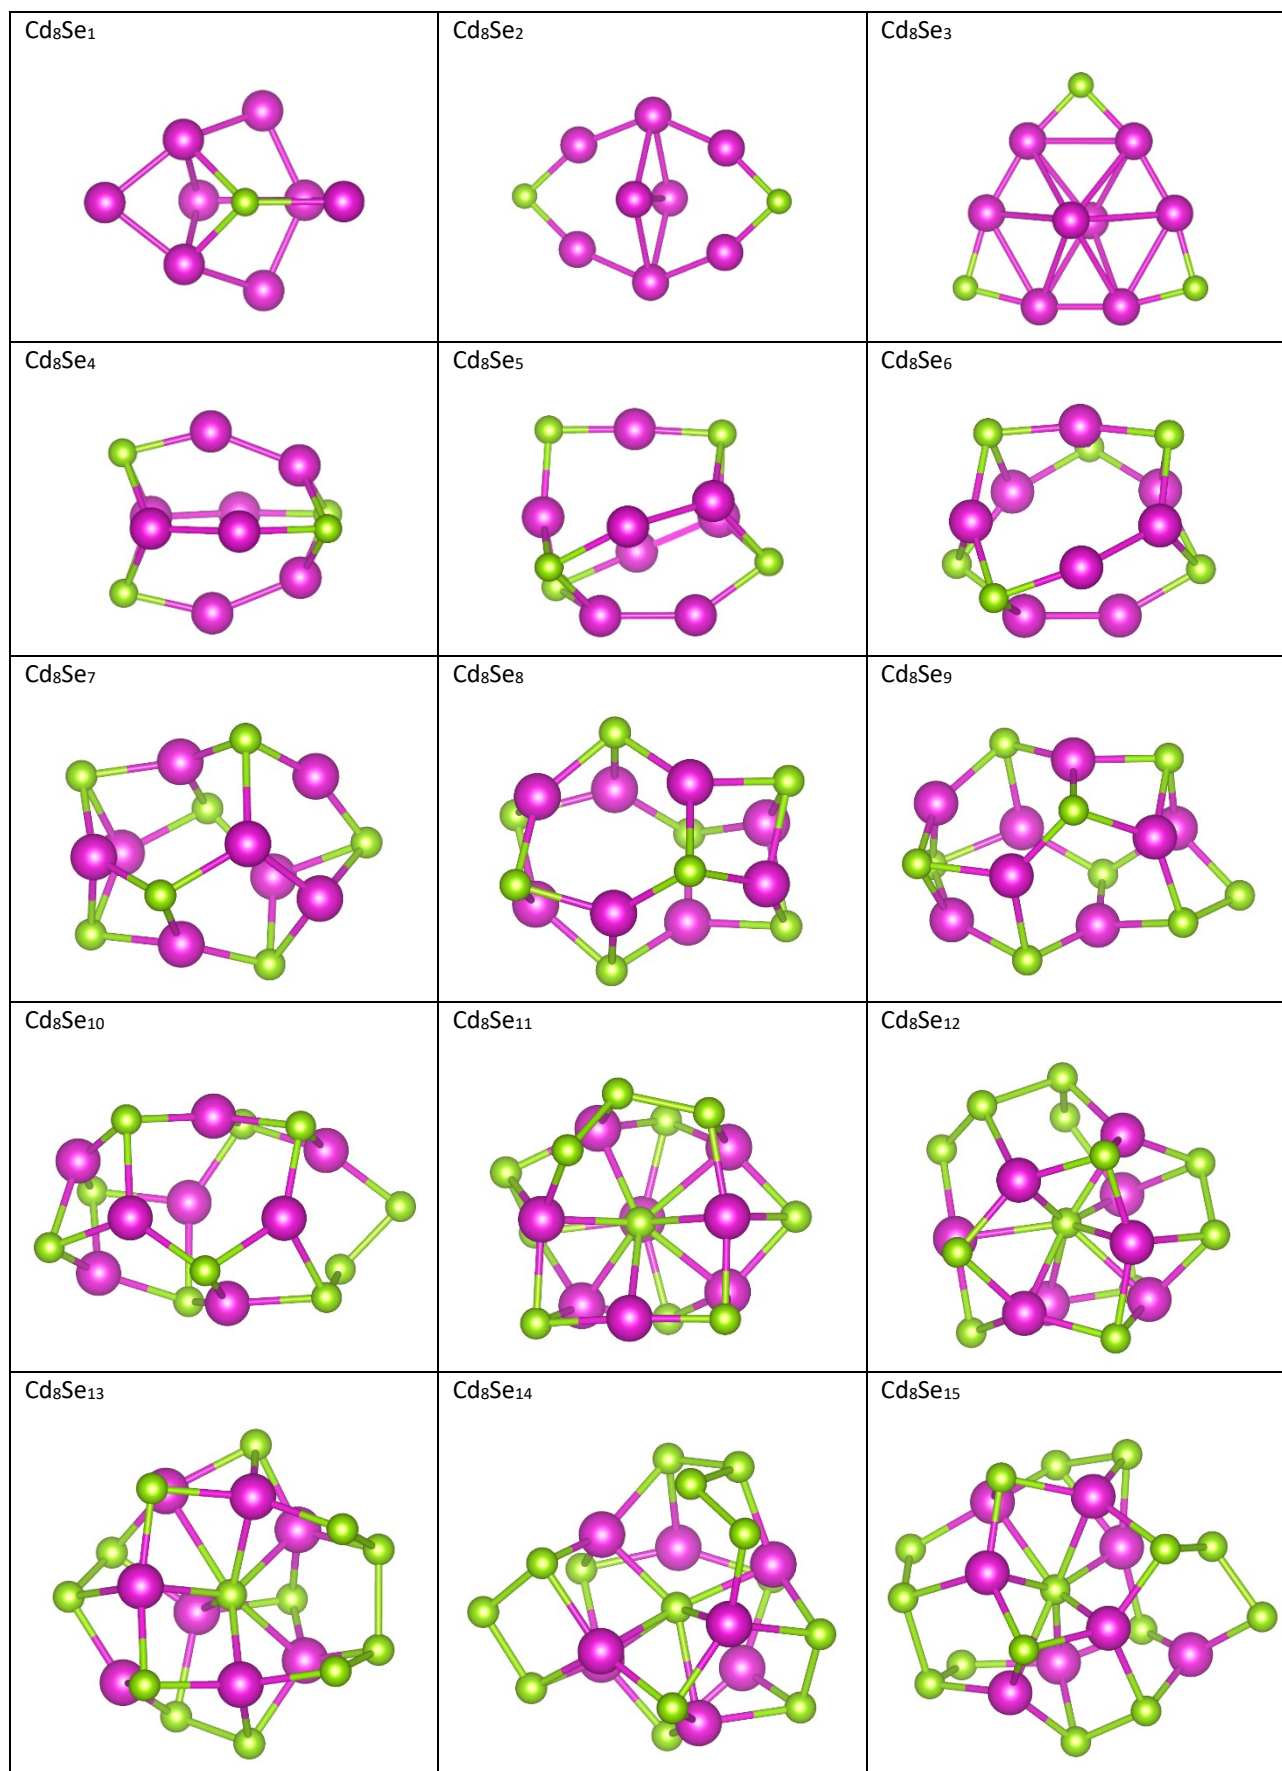

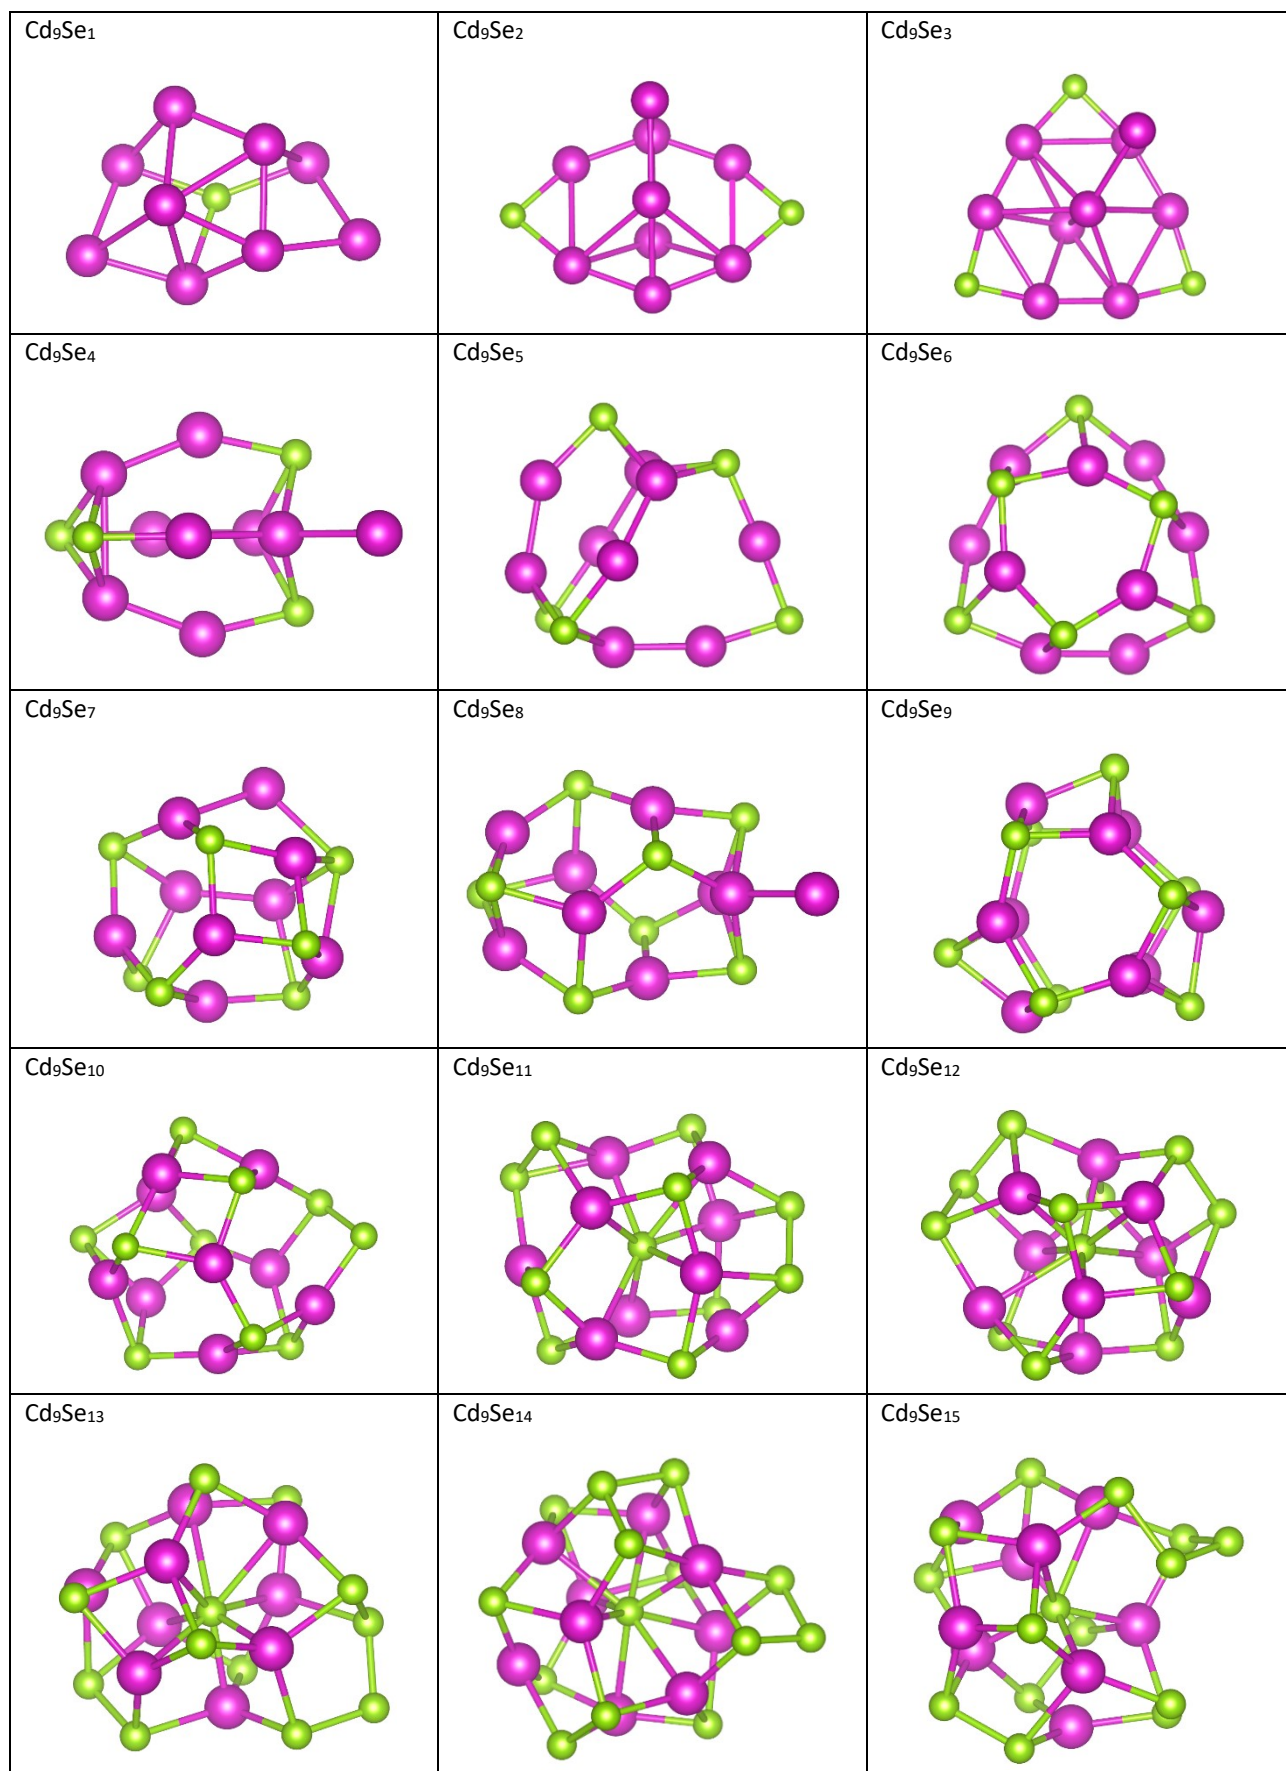

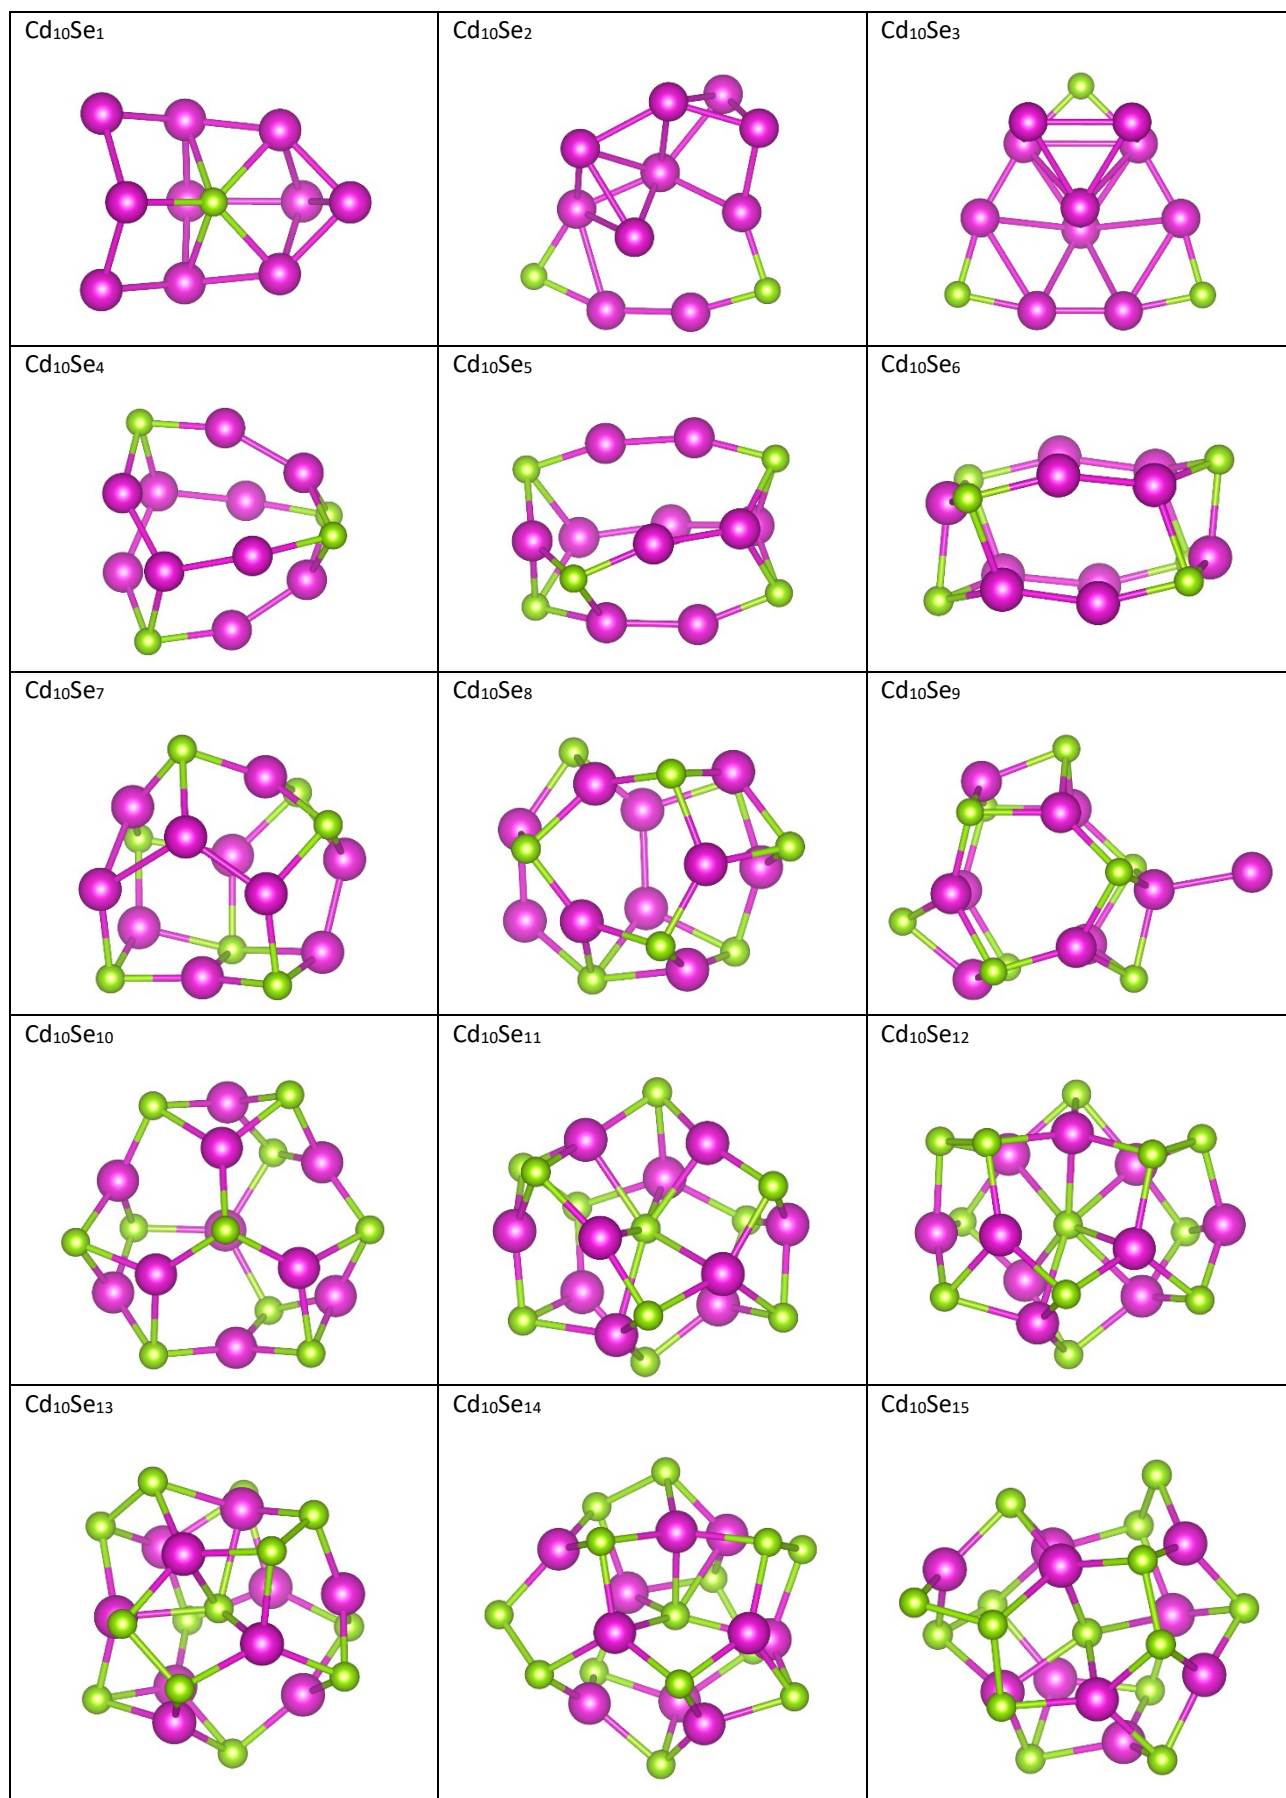

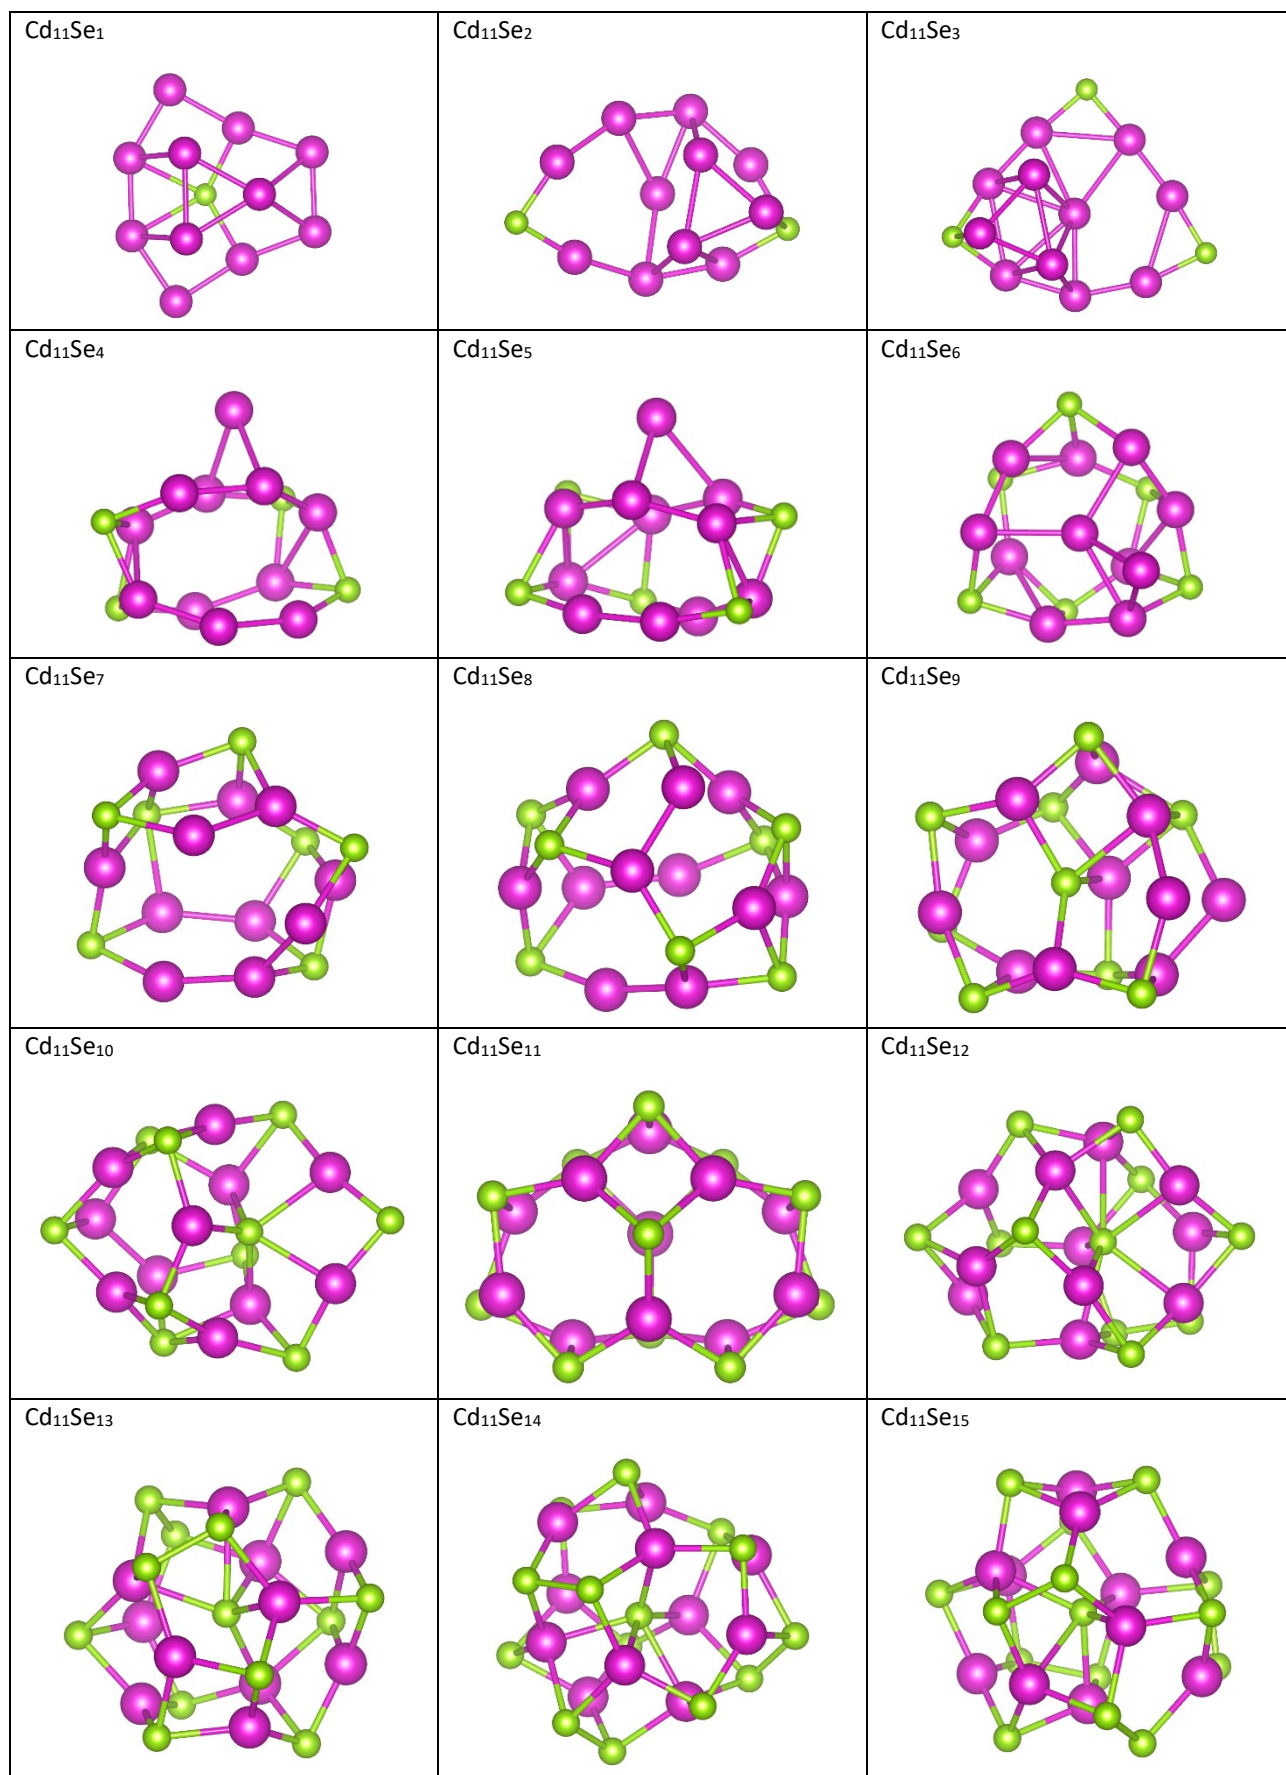

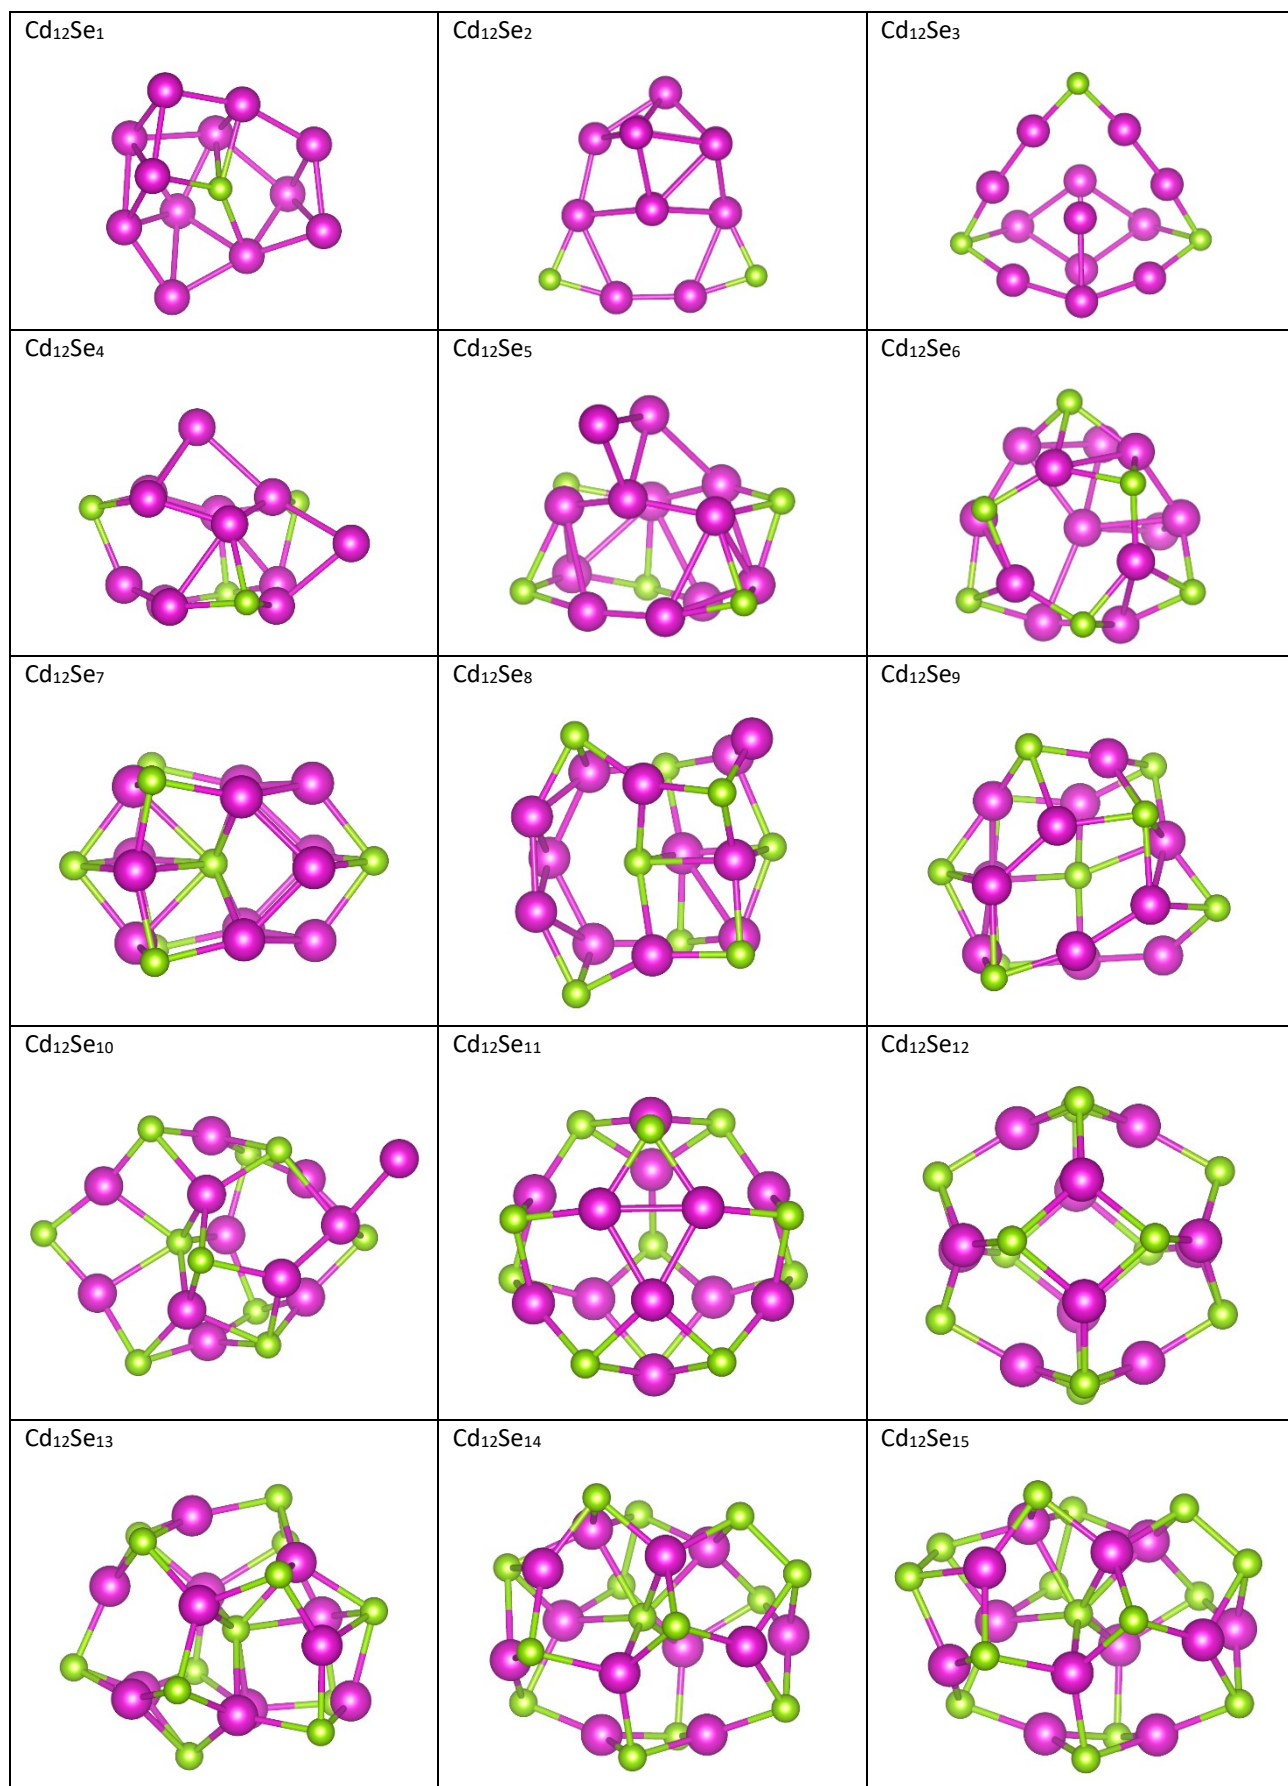

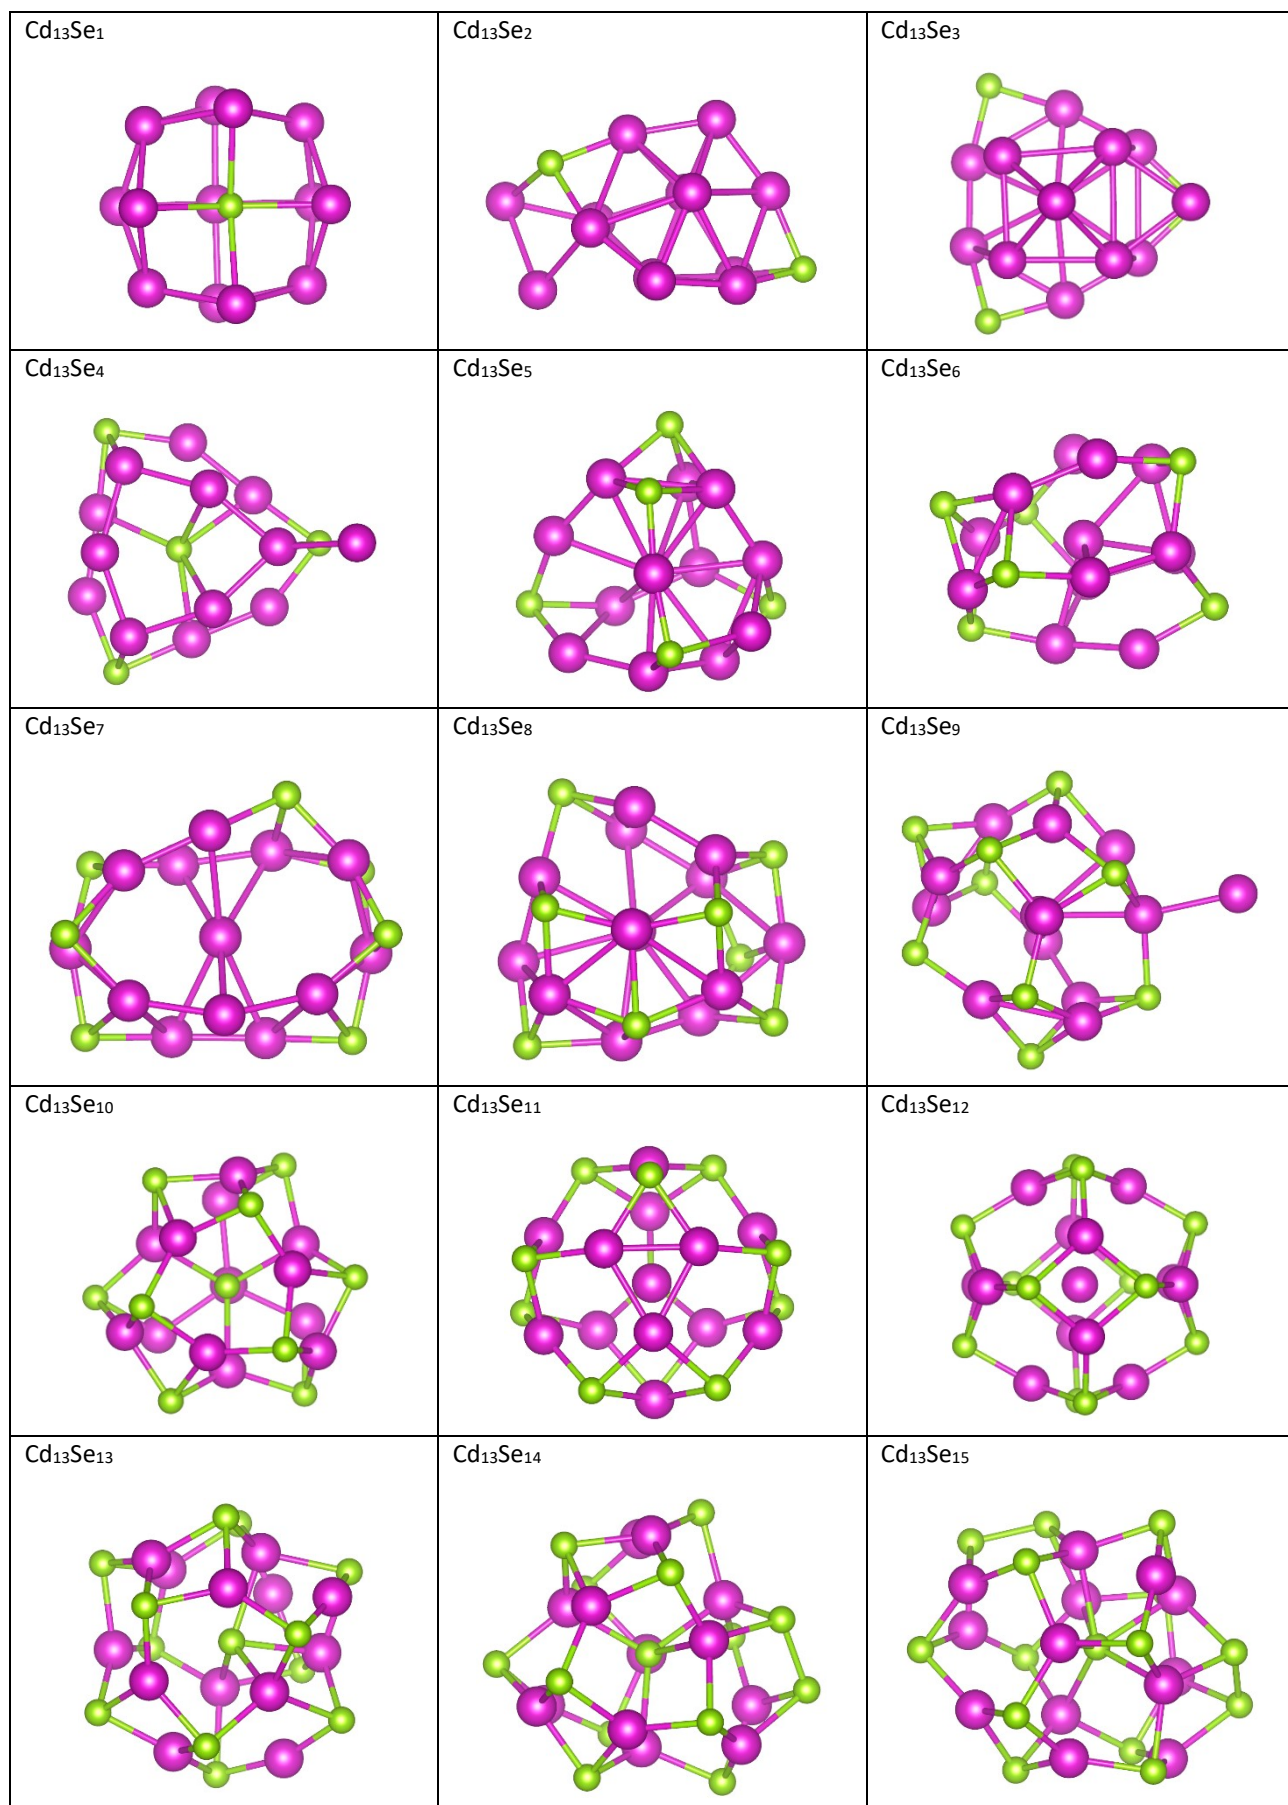

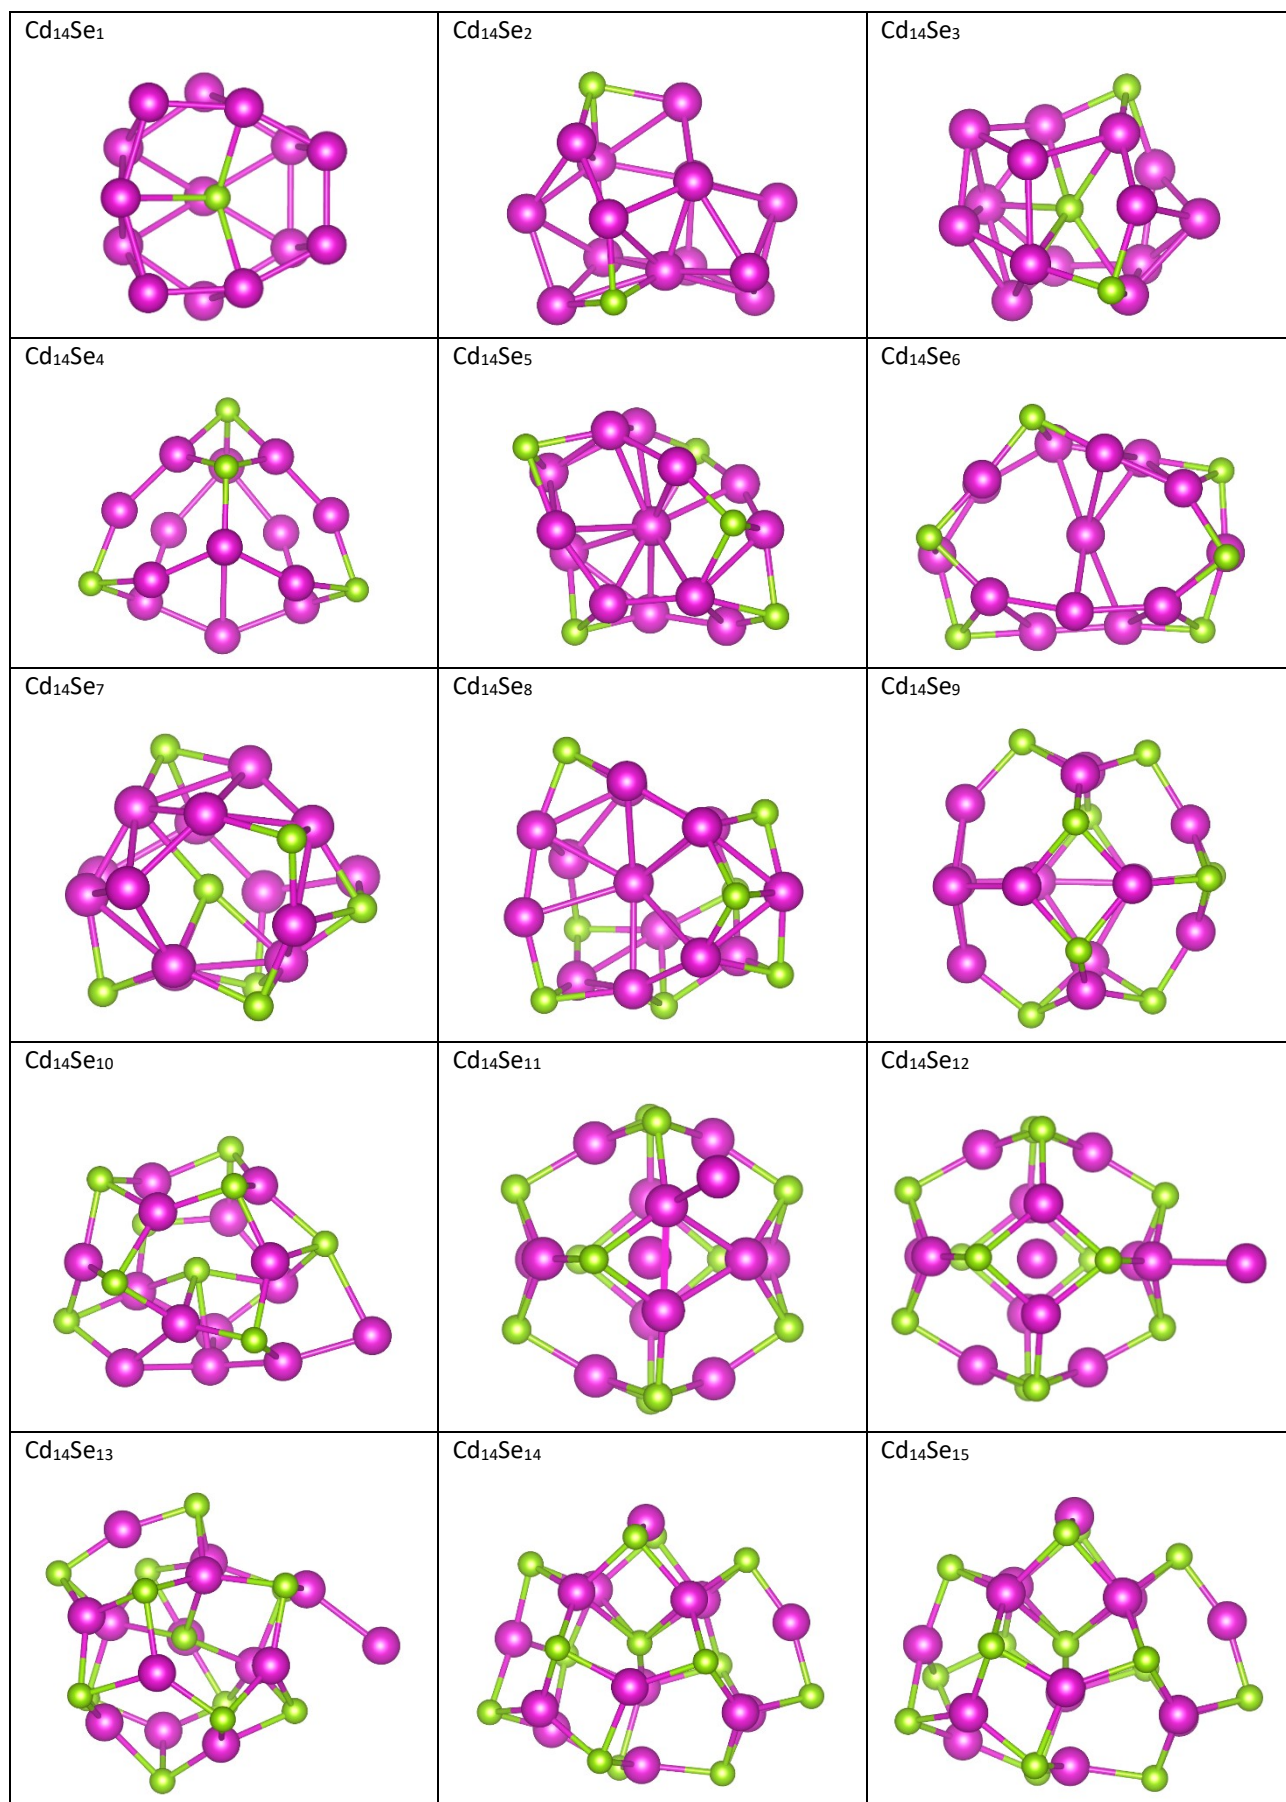

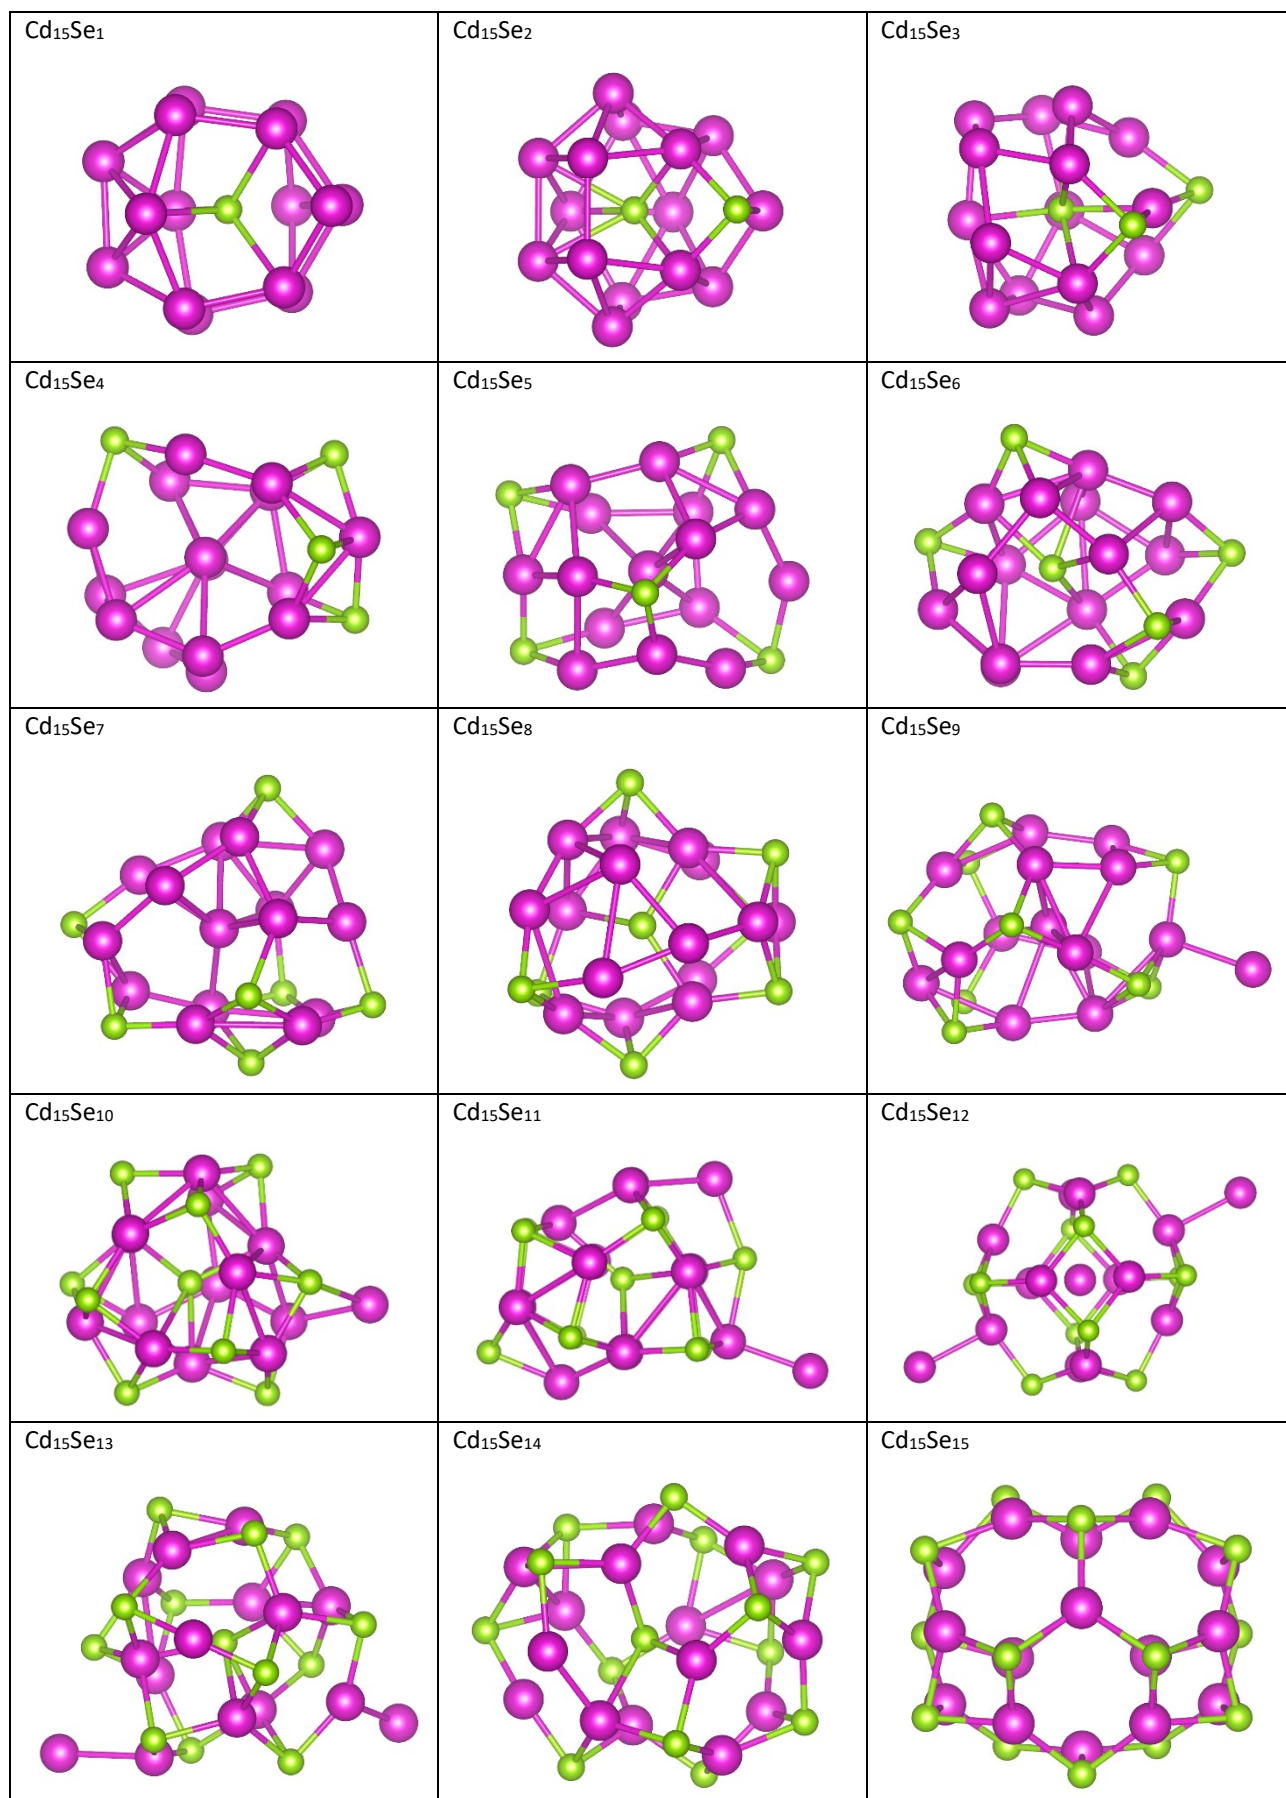



**Figure S1** Relative stability of  $\text{Cd}_n\text{Se}_m$  clusters expressed via lesser of two second-order differences:  $E(n, m + 1) + E(n, m - 1) - 2E(n, m)$  and  $E(n + 1, m) + E(n - 1, m) - 2E(n, m)$ , where  $E(n, m)$  is a total energy of  $\text{Cd}_n\text{Se}_m$  cluster. As any cluster is globally unstable towards coalescence into the bulk, such a relative stability criteria are used

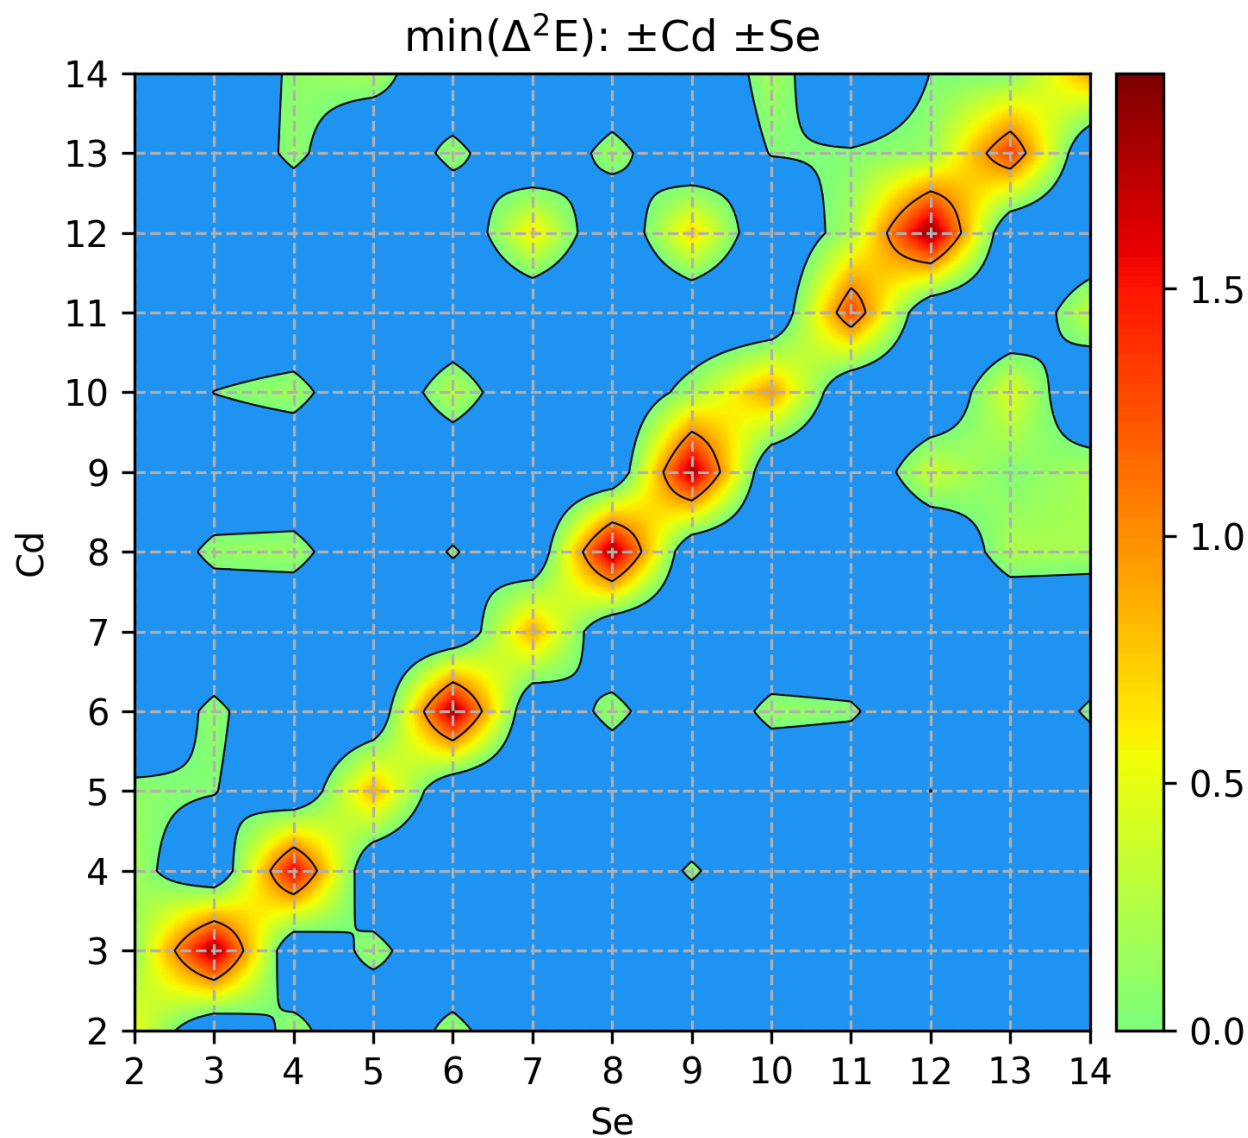

**Figure S2** The structure, DOS and  $IPR = 1/N_{loc}(i)$  of the  $Cd_{10}Se_{15}$  (a) and  $Cd_{11}Se_{12}$  (b) clusters, corresponding to three stabilization stages

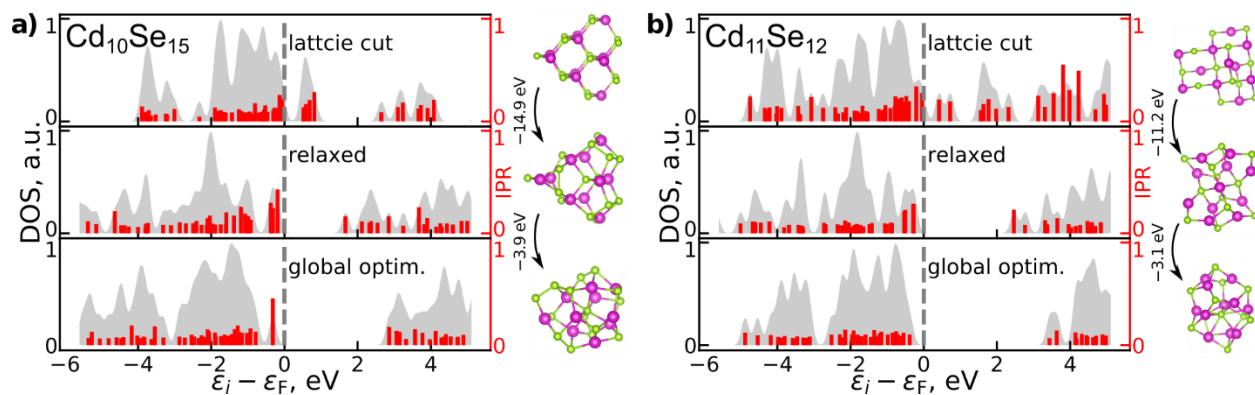

**Table S2.** Wavefunction, type and localization of strong and medium near-gap traps

|                                                                                                                                                                                         |                                                                                                                                                                                        |
|-----------------------------------------------------------------------------------------------------------------------------------------------------------------------------------------|----------------------------------------------------------------------------------------------------------------------------------------------------------------------------------------|
| 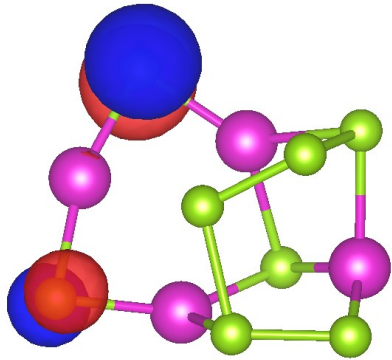 <p>Cd<sub>4</sub>Se<sub>8</sub>; HOMO; <math>T_a^I + T_a^I</math>; <math>N_{loc} = 2.193</math></p>   |  <p>Cd<sub>4</sub>Se<sub>9</sub>; HOMO; <math>T_a^I + T_a^I</math>; <math>N_{loc} = 2.569</math></p> |
|  <p>Cd<sub>4</sub>Se<sub>11</sub>; HOMO; <math>T_a^I + T_a^I</math>; <math>N_{loc} = 2.754</math></p> |  <p>Cd<sub>4</sub>Se<sub>15</sub>; HOMO; <math>T_c^I</math>; <math>N_{loc} = 3.360</math></p>       |
|  <p>Cd<sub>5</sub>Se<sub>3</sub>; HOMO-1; <math>T_a^I</math>; <math>N_{loc} = 1.388</math></p>       |  <p>Cd<sub>5</sub>Se<sub>6</sub>; HOMO; <math>T_a^I</math>; <math>N_{loc} = 1.344</math></p>       |

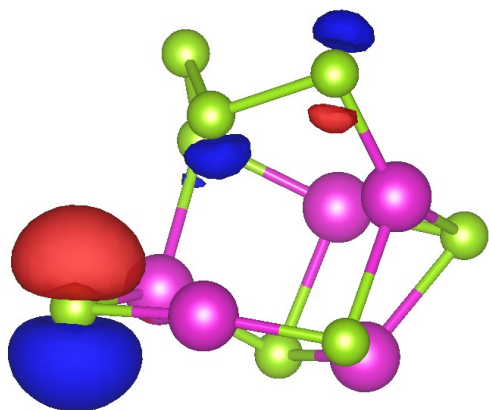

Cd<sub>5</sub>Se<sub>8</sub>; HOMO;  $T_a^I$ ;  $N_{loc} = 2.220$

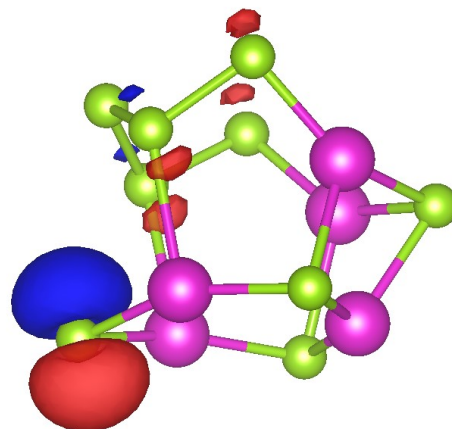

Cd<sub>5</sub>Se<sub>9</sub>; HOMO;  $T_a^I$ ;  $N_{loc} = 2.644$

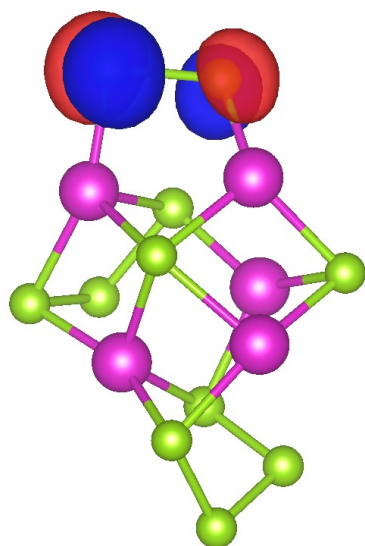

Cd<sub>5</sub>Se<sub>11</sub>; HOMO;  $T_c^I$ ;  $N_{loc} = 2.394$

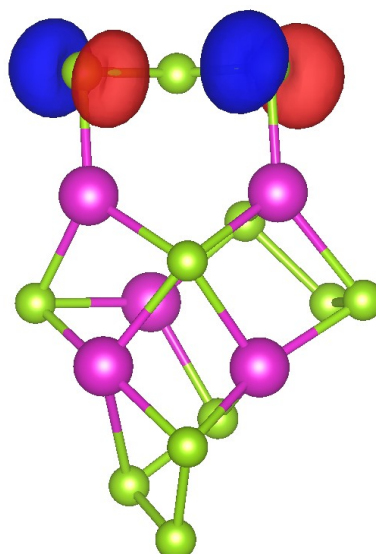

Cd<sub>5</sub>Se<sub>12</sub>; HOMO;  $T_a^I + T_a^I$ ;  $N_{loc} = 2.796$

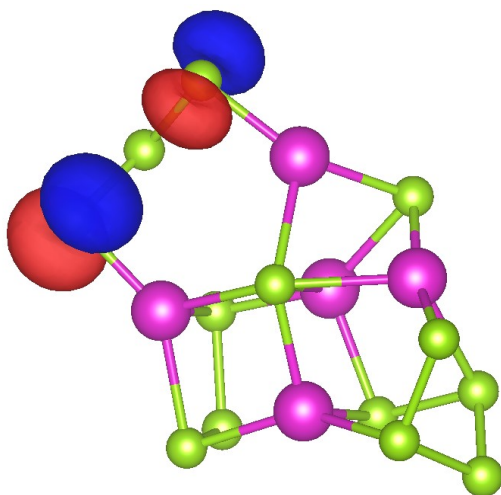

Cd<sub>5</sub>Se<sub>13</sub>; HOMO - 1;  $T_a^I + T_a^I$ ;  $N_{loc} = 3.514$

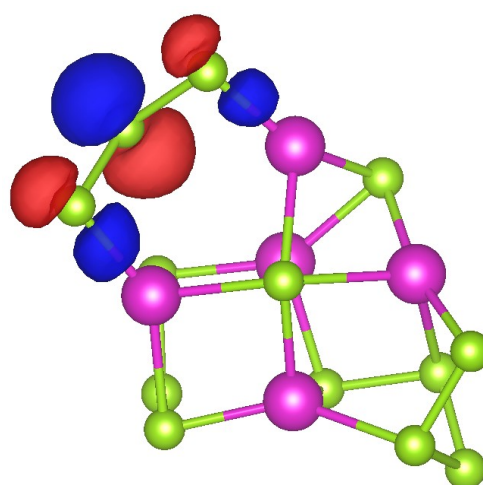

Cd<sub>5</sub>Se<sub>13</sub>; HOMO;  $T_d^I$ ;  $N_{loc} = 2.519$

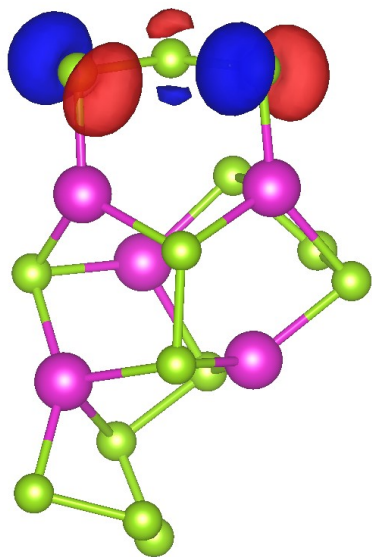

Cd<sub>5</sub>Se<sub>14</sub>; HOMO - 1;  $T_a^I + T_a^I$ ;  $N_{loc} = 3.698$

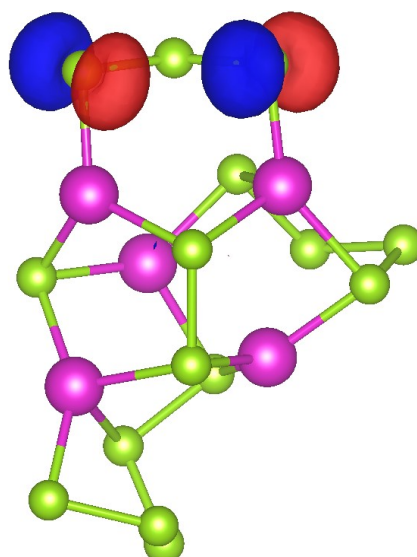

Cd<sub>5</sub>Se<sub>15</sub>; HOMO - 1;  $T_a^I + T_a^I$ ;  $N_{loc} = 3.098$

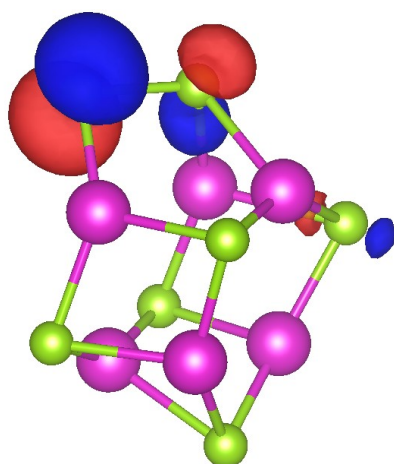

Cd<sub>6</sub>Se<sub>7</sub>; HOMO;  $T_b^I$ ;  $N_{loc} = 2.374$

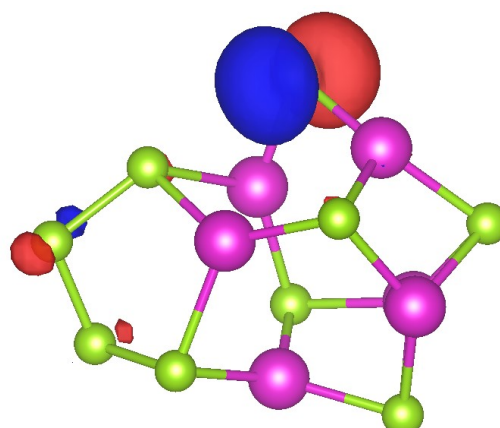

Cd<sub>6</sub>Se<sub>9</sub>; HOMO;  $T_a^I$ ;  $N_{loc} = 2.085$

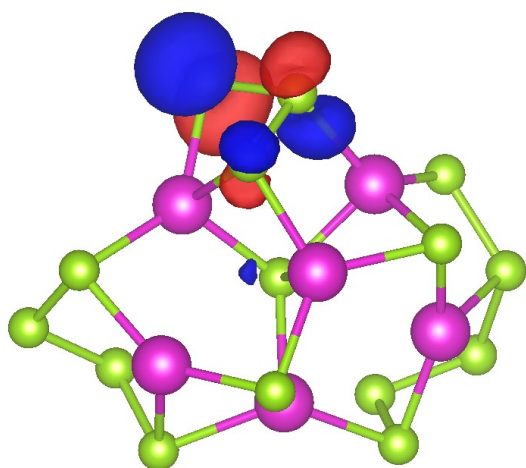

Cd<sub>6</sub>Se<sub>15</sub>; HOMO;  $T_b^I$ ;  $N_{loc} = 2.719$

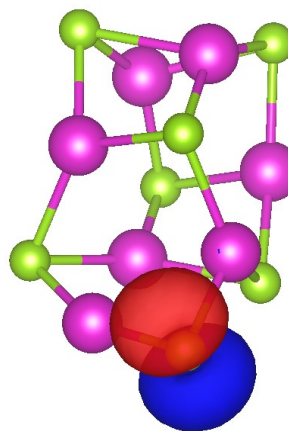

Cd<sub>7</sub>Se<sub>7</sub>; HOMO;  $T_a^I$ ;  $N_{loc} = 1.584$

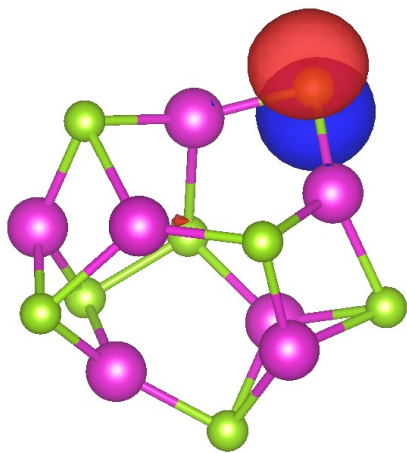

$\text{Cd}_7\text{Se}_8$ ; HOMO;  $T_a^1$ ;  $N_{\text{loc}} = 1.592$

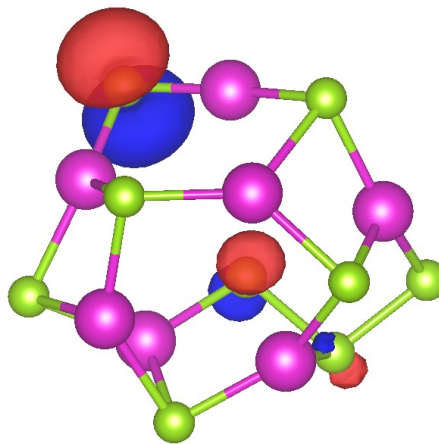

$\text{Cd}_7\text{Se}_9$ ; HOMO;  $T_a^1$ ;  $N_{\text{loc}} = 2.463$

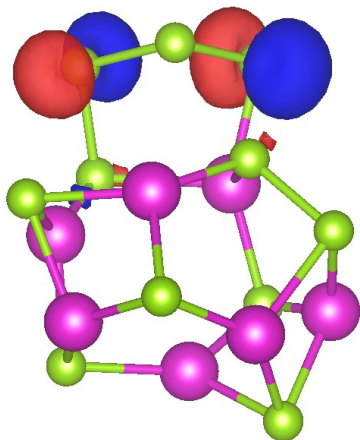

$\text{Cd}_7\text{Se}_{11}$ ; HOMO - 1;  $T_a^1 + T_a^1$ ;  $N_{\text{loc}} = 3.339$

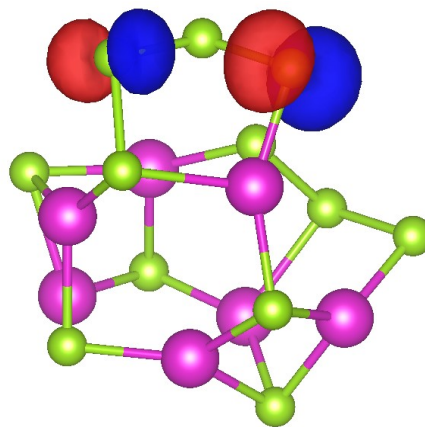

$\text{Cd}_7\text{Se}_{12}$ ; HOMO - 1;  $T_a^1 + T_a^1$ ;  $N_{\text{loc}} = 3.059$

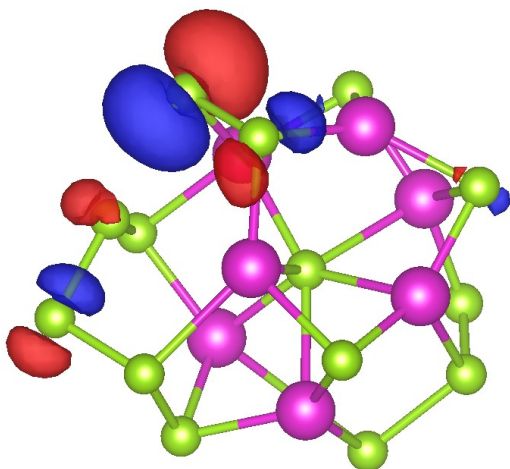

$\text{Cd}_7\text{Se}_{15}$ ; HOMO;  $T_b^1$ ;  $N_{\text{loc}} = 2.728$

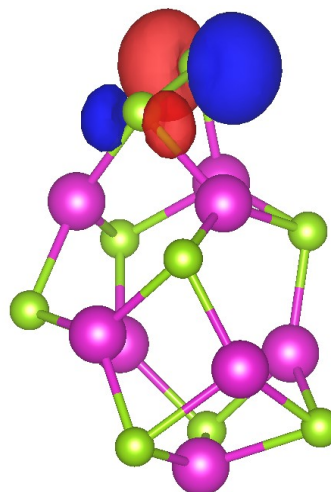

$\text{Cd}_8\text{Se}_9$ ; HOMO;  $T_b^1$ ;  $N_{\text{loc}} = 1.747$

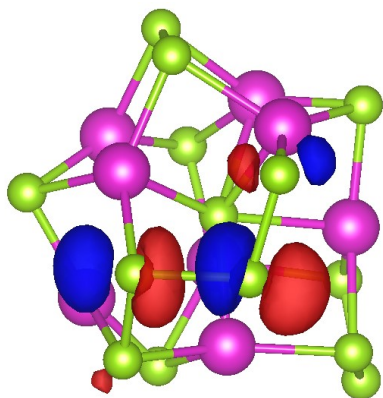

Cd<sub>8</sub>Se<sub>14</sub>; LUMO;  $T_b^H$ ;  $N_{loc} = 3.942$

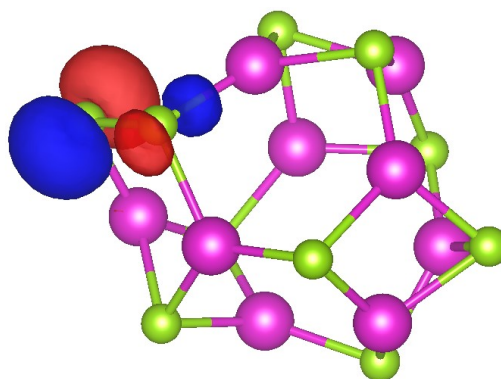

Cd<sub>9</sub>Se<sub>10</sub>; HOMO;  $T_b^I$ ;  $N_{loc} = 2.053$

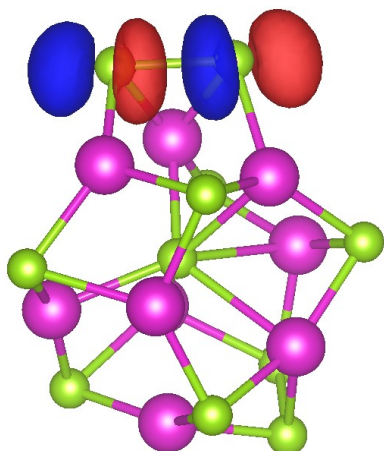

Cd<sub>9</sub>Se<sub>11</sub>; LUMO + 1;  $T_a^H$ ;  $N_{loc} = 3.906$

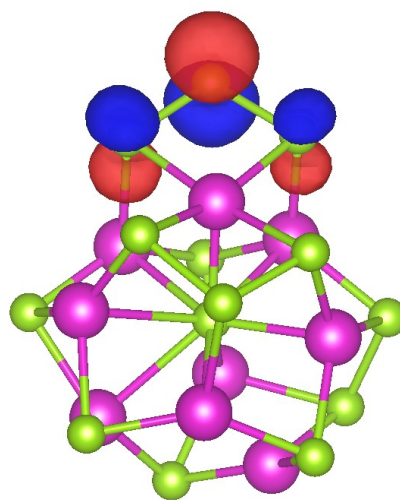

Cd<sub>9</sub>Se<sub>14</sub>; HOMO;  $T_e^I$ ;  $N_{loc} = 3.800$

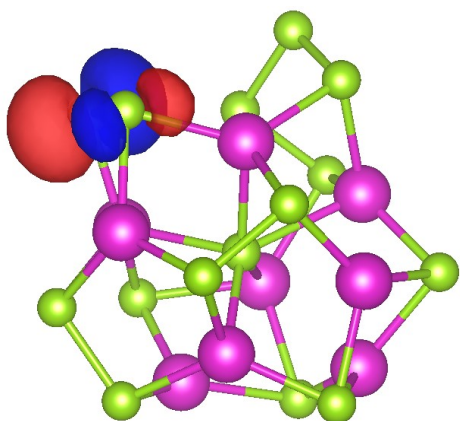

Cd<sub>9</sub>Se<sub>15</sub>; HOMO;  $T_b^I$ ;  $N_{loc} = 2.140$

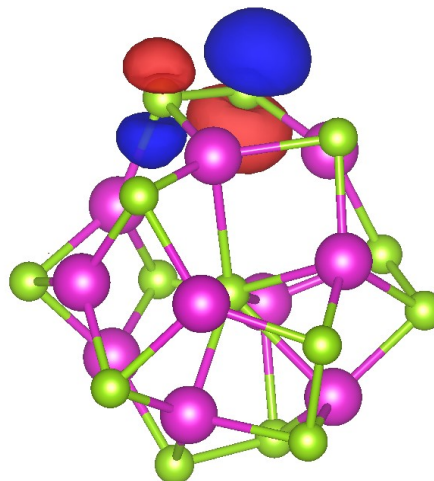

Cd<sub>10</sub>Se<sub>14</sub>; HOMO;  $T_b^I$ ;  $N_{loc} = 2.149$

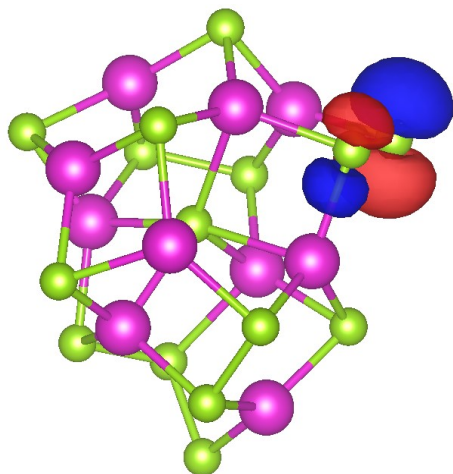

Cd<sub>10</sub>Se<sub>15</sub>; HOMO;  $T_b^I$ ;  $N_{loc} = 2.177$

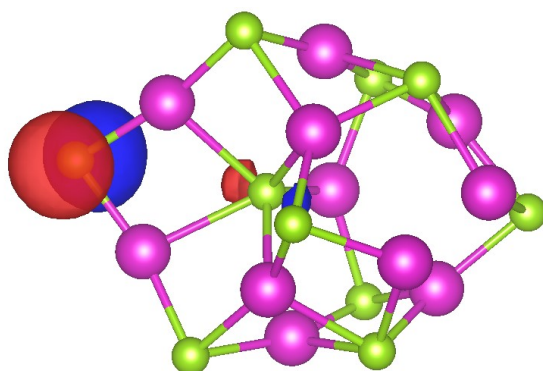

Cd<sub>11</sub>Se<sub>10</sub>; HOMO - 1;  $T_a^I$ ;  $N_{loc} = 1.728$

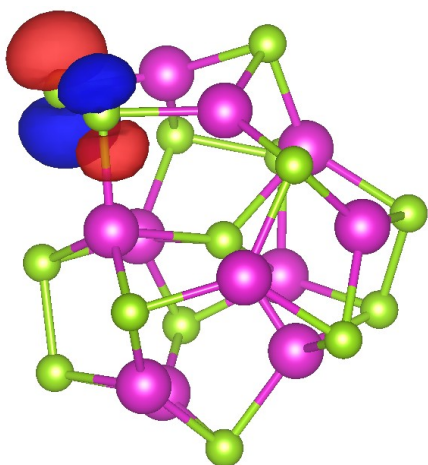

Cd<sub>11</sub>Se<sub>15</sub>; HOMO;  $T_b^I$ ;  $N_{loc} = 2.664$

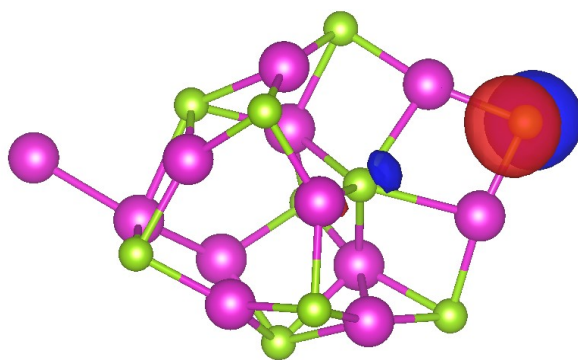

Cd<sub>12</sub>Se<sub>10</sub>; HOMO - 1;  $T_a^I$ ;  $N_{loc} = 1.781$

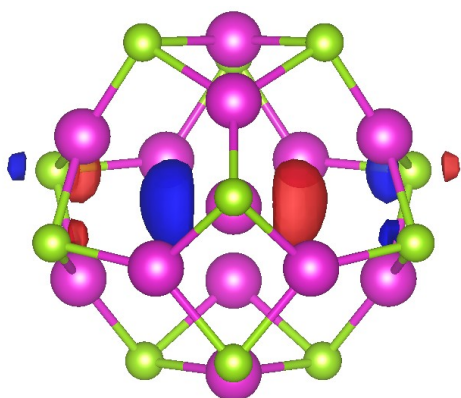

Cd<sub>13</sub>Se<sub>11</sub>; LUMO + 1;  $T^{III}$ ;  $N_{loc} = 2.959$

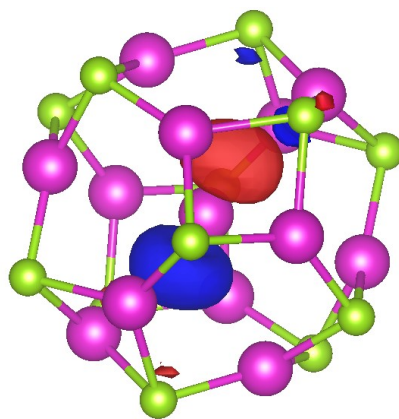

Cd<sub>13</sub>Se<sub>12</sub>; LUMO + 1;  $T^{III}$ ;  $N_{loc} = 2.097$



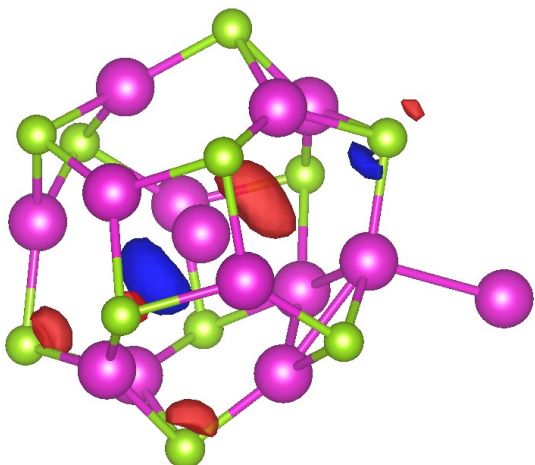

Cd<sub>14</sub>Se<sub>11</sub>; LUMO + 1;  $T^{\text{III}}$ ;  $N_{\text{loc}} = 3.744$

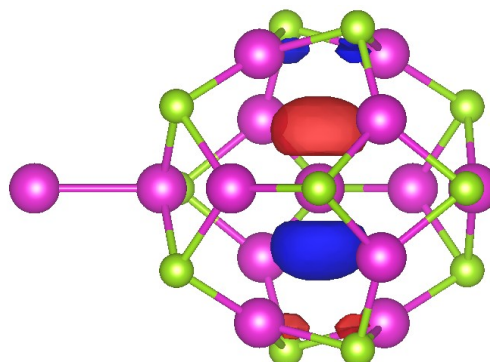

Cd<sub>14</sub>Se<sub>12</sub>; LUMO + 1;  $T^{\text{III}}$ ;  $N_{\text{loc}} = 2.148$

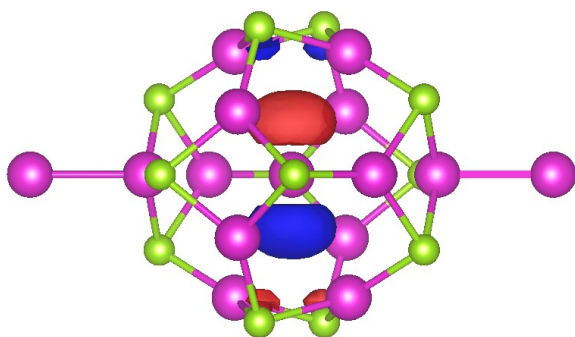

Cd<sub>15</sub>Se<sub>12</sub>; LUMO + 1;  $T^{\text{III}}$ ;  $N_{\text{loc}} = 2.195$
